# Supplementary material for: Addressing the autofluorescence issue in deep tissue imaging by two-photon microscopy: the significance of far-red emitting dyes
Source: PubMed Central journal article supplement — Chem Sci. 2017 Sep 18;8(11):7696–704. doi: 10.1039/c7sc03362a (PMC5851340; doi:10.1039/c7sc03362a), 2017-09-18

## Electronic Supplementary Information

### Addressing the Autofluorescence Issue in Deep Tissue Imaging by Two-Photon Microscopy: Significance of Far-Red Emitting Dyes

Yong Woong Jun,<sup>a</sup> Hye Rim Kim,<sup>a</sup> Ye Jin Reo,<sup>a</sup> Mingchong Dai<sup>a</sup> and Kyo Han Ahn<sup>\*a</sup>

<sup>a</sup>Department of Chemistry, Pohang University of Science and Technology (POSTECH), 77 Cheongam-Ro, Nam-Gu, Pohang, Gyungbuk, Republic of Korea 37673

#### Table of contents

|                                                                                                                    |     |
|--------------------------------------------------------------------------------------------------------------------|-----|
| <b>1. Scheme</b>                                                                                                   |     |
| 1) Scheme S1.                                                                                                      | S2  |
| 2) Synthesis                                                                                                       | S2  |
| <b>2. Figures</b>                                                                                                  |     |
| 1) Fig. S1. UV/Vis absorption spectra of <b>Py<sup>+</sup>BC</b> derivatives in different solvents.                | S7  |
| 2) Fig. S2. Fluorescence emission spectra of <b>Py<sup>+</sup>BC</b> derivatives in different solvents.            | S8  |
| 3) Fig. S3. UV/Vis absorption spectra of <b>Py<sup>+</sup>BC</b> derivatives at 10–100 μM concentration in buffer. | S9  |
| 4) Fig. S4. Cell permeability test of <b>Py<sup>+</sup>BC690</b> and <b>Py<sup>+</sup>BC680b</b> in HeLa cells.    | S9  |
| 5) Fig. S5. Two-photon action spectra of <b>Py<sup>+</sup>BC690</b> and <b>Py<sup>+</sup>BC680b</b> .              | S10 |
| 6) Fig. S6. Autofluorescence analysis in different tissues.                                                        | S10 |
| 7) Fig. S7. Comparison of autofluorescence between the highest and lowest channel.                                 | S11 |
| 8) Fig. S8. 3D 2P-images of a mouse brain stained with <b>Py<sup>+</sup>BC690</b> after the BABB clearance.        | S11 |
| 9) Fig. S9. Photostability test of <b>Py<sup>+</sup>BC</b> derivatives in organic solvent under UV irradiation     | S12 |
| 10) Fig. S10. Photostability test of <b>Py<sup>+</sup>BC</b> derivatives in cells under two-photon irradiation     | S12 |
| 11) Fig. S11. Fluorescent intensities depending on pH of <b>Py<sup>+</sup>BC</b> derivatives in universal buffer   | S13 |
| 12) Fig. S12. Cell viability test of <b>Py<sup>+</sup>BC</b> derivatives                                           | S13 |
| <b>3. Tables</b>                                                                                                   |     |
| 1) Table S1. Maximum absorbance wavelengths of <b>Py<sup>+</sup>BC</b> derivatives in different solvents.          | S14 |
| 2) Table S2. Maximum emission wavelengths of <b>Py<sup>+</sup>BC</b> derivatives in different solvents.            | S14 |
| 3) Table S3. Molar extinction coefficients of <b>Py<sup>+</sup>BC</b> derivatives in different solvents.           | S14 |
| 4) Table S4. Quantum yield ( $\Phi_F$ ) of <b>Py<sup>+</sup>BC</b> derivatives in different solvents.              | S15 |
| 5) Table S5. Comparison table of <b>Py<sup>+</sup>BC690</b> with precedent red and far-red emitting 2P dyes        | S15 |
| <b>4. Notes</b>                                                                                                    | S16 |
| <b>5. References</b>                                                                                               | S17 |
| <b>6. NMR spectra</b>                                                                                              | S18 |
| <b>7. HRMS spectra</b>                                                                                             | S24 |

## 1. Scheme

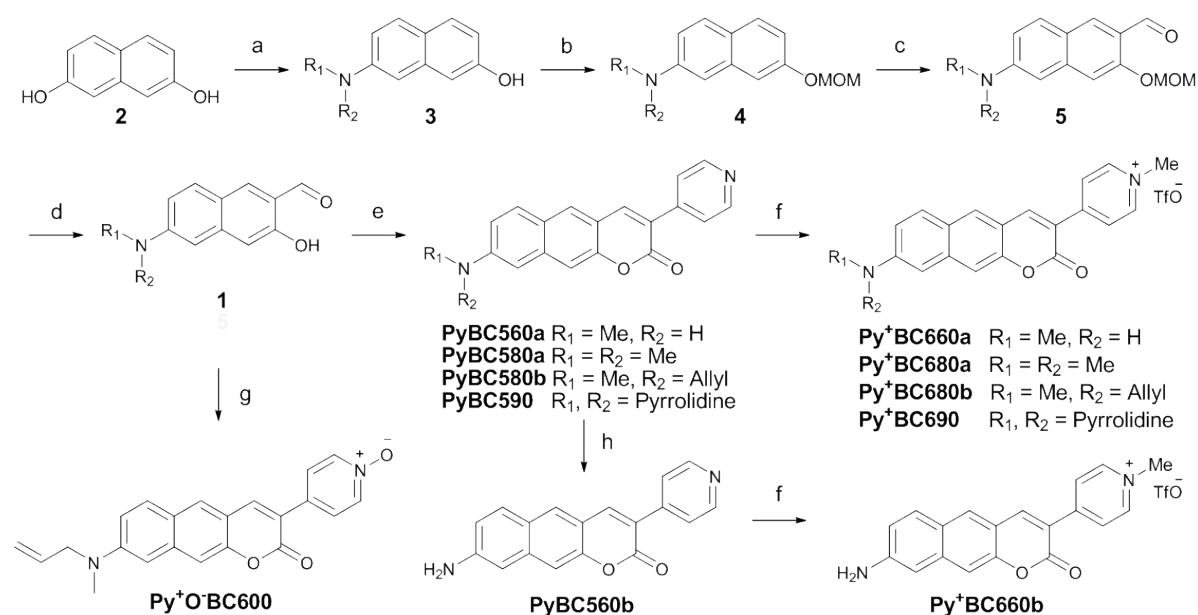

**Scheme S1.** Reagents and conditions: a)  $\text{Na}_2\text{S}_2\text{O}_5$ ,  $\text{HNR}_1\text{R}_2$ ,  $\text{H}_2\text{O}$ ,  $150^\circ\text{C}$  8 h. b)  $\text{NaH}$ , DMF, chloromethyl methyl ether,  $-15^\circ\text{C}$ , 7 h. c)  $t\text{-BuLi}$ ,  $\text{Et}_2\text{O}$ ; DMF,  $-15^\circ\text{C}$ , 2 h. d)  $\text{HCl}$ ,  $i\text{-PrOH}$ ,  $60^\circ\text{C}$ , 3 h. e) 4-Pyridineacetic acid hydrochloride, EDC, HOBt,  $\text{Et}_3\text{N}$ ,  $\text{CH}_2\text{Cl}_2$ ,  $25^\circ\text{C}$ , 24 h. f)  $\text{CF}_3\text{SO}_3\text{CH}_3$ ,  $\text{CH}_2\text{Cl}_2$ ,  $25^\circ\text{C}$  4 h. g) 4-(2-Ethoxy-2-oxoethyl)pyridine 1-oxide, piperidine,  $\text{EtOH}$ ,  $30^\circ\text{C}$ , 8 h. h)  $\text{Pd}(\text{PPh}_3)_4$ , NDMBA,  $60^\circ\text{C}$ , 5 h.

## Synthesis

**6-(Di-alkyl- or monoalkylamino)-3-hydroxy-2-naphthaldehydes (1).** These compounds were synthesized by following the reported procedure<sup>1</sup> using the corresponding amines.

**3-(Pyridin-4-yl)-8-(pyrrolidin-1-yl)-2H-benzo[*g*]chromen-2-one (PyBC590).** A solution of 3-hydroxy-6-(pyrrolidin-1-yl)-2-naphthaldehyde (100 mg, 0.41 mmol)<sup>1</sup> and 4-pyridineacetic acid hydrochloride (108 mg, 0.62 mmol) in dichloromethane (2 mL) was treated with triethylamine (173  $\mu\text{L}$ , 1.24 mmol). After being stirred for 10 min, the solution was treated with 1-(3-dimethylaminopropyl)-3-ethylcarbodiimide (EDC, 119 mg, 0.62 mmol) and 1-hydroxybenzotriazole hydrate (HOBt, 84 mg, 0.62 mmol). The resulting mixture, after being stirred for 24 h at room temperature, was subjected to extraction with dichloromethane. The organic layer was washed with brine, dried over anhydrous  $\text{Na}_2\text{SO}_4$ , and concentrated. The crude product was purified by silica gel column chromatography (eluent:  $\text{MeOH}/\text{CH}_2\text{Cl}_2 = 3/97$ ) to afford **PyBC590** as an orange solid (120 mg, 84%).  $^1\text{H}$  NMR (300 MHz,  $\text{CDCl}_3$ , 298 K):  $\delta$  8.68 (d,  $J = 4.5$  Hz, 2H), 7.99 (s, 1H), 7.87 (s, 1H), 7.76 (d,  $J = 9.2$  Hz, 1H), 7.69 (d,  $J = 4.5$  Hz, 2H), 7.44 (s, 1H), 7.01 (dd,  $J = 9.2, 2.4$  Hz, 1H), 6.69 (d,  $J = 2.4$  Hz, 1H), 3.47 (t,  $J = 6.6$  Hz, 4H), 2.14–2.07 (m, 4H).  $^{13}\text{C}$  NMR (600 MHz,  $\text{CDCl}_3$ , 298 K):  $\delta$  159.8, 150.6, 149.5, 147.2, 142.4, 141.5, 137.2, 129.4, 128.5, 122.9, 122.1, 121.6, 115.8, 114.5, 108.7, 102.7, 47.2 (2 carbons), 25.0 (2 carbons). HRMS (ESI)  $m/z$ :  $[\text{M} + \text{H}]^+$  calcd for  $\text{C}_{22}\text{H}_{18}\text{N}_2\text{O}_2$ , 342.1368; found, 343.1447.

**1-Methyl-4-(2-oxo-8-(pyrrolidin-1-yl)-2H-benzo[*g*]chromen-3-yl)pyridinium trifluoromethanesulfonate (Py<sup>+</sup>BC690).** To a solution of **PyBC590** (50 mg, 0.15 mmol) in dichloromethane (1 mL) was added methyl trifluoromethanesulfonate (MeOTf,

25  $\mu$ L, 0.22 mmol) dropwise, and the resulting solution was stirred for 4 h at room temperature. The organic solvent was removed under reduced pressure, and the residue was washed with dichloromethane and hexane (1:9) several times, and then dried in vacuum to give **Py<sup>+</sup>BC690** as a red-violet solid (63 mg, 85%). mp 282 °C, <sup>1</sup>H NMR (600 MHz, DMSO-*d*<sub>6</sub>, 298 K):  $\delta$  8.95 (d, *J* = 7.2 Hz, 2H), 8.88 (s, 1H), 8.54 (d, *J* = 7.2 Hz, 2H), 8.22 (s, 1H), 7.93 (d, *J* = 9.6 Hz, 1H), 7.52 (s, 1H), 7.12 (dd, *J* = 9.6 Hz, 2.4 Hz, 1H), 6.82 (d, *J* = 2.4 Hz, 1H), 4.32 (s, 3H), 3.44 (t, *J* = 6.6 Hz, 4H), 2.03 (m, 4H). <sup>13</sup>C NMR (600 MHz, DMSO-*d*<sub>6</sub>, 298 K):  $\delta$  159.5, 151.3, 150.8, 148.7, 147.2, 145.3, 138.8, 132.1, 131.3, 125.4, 123.6, 117.4, 116.9, 114.8, 108.7, 103.6, 48.0, 47.6 (2 carbons), 25.4 (2 carbons). IR (KBr):  $\nu$  = 3129, 3047, 2964, 2848, 1701, 1630, 1581, 1551, 1322, 1300, 1262, 1229, 1201, 1185, 1141 cm<sup>-1</sup>. HRMS (ESI) *m/z*: [M + H]<sup>+</sup> calcd for C<sub>23</sub>H<sub>21</sub>N<sub>2</sub>O<sub>2</sub>, 357.1603; found, 357.1603.

**8-(Dimethylamino)-3-(pyridin-4-yl)-2H-benzo[*g*]chromen-2-one (PyBC580a)**. Starting from 6-(dimethylamino)-3-hydroxy-2-naphthaldehyde (30 mg, 0.14 mmol), this compound was similarly synthesized as an orange solid (33.4 mg, 74%). <sup>1</sup>H NMR (500 MHz, CDCl<sub>3</sub>,  $\delta$ ): 8.69 (d, *J* = 4.5 Hz, 2H), 8.01 (s, 1H), 7.90 (s, 1H), 7.77 (d, *J* = 9.3 Hz, 1H), 7.69 (d, *J* = 4.5 Hz, 2H), 7.48 (s, 1H), 7.16 (dd, *J* = 9.3, 2.3 Hz, 1H), 6.84 (d, *J* = 2.3 Hz, 1H), 3.15 (s, 6H). <sup>13</sup>C NMR (600 MHz, CDCl<sub>3</sub>+MeOD,  $\delta$ ): 160.4, 151.0, 150.3, 149.5, 143.3, 142.4, 137.5, 129.8, 129.0, 123.7, 122.9, 122.1, 116.2, 115.4, 109.7, 104.1, 40.2 (2 carbons). HRMS (ESI) *m/z*: [M + H]<sup>+</sup> calcd for C<sub>20</sub>H<sub>16</sub>N<sub>2</sub>O<sub>2</sub>, 316.1212; found, 317.1290.

**4-(8-(Dimethylamino)-2-oxo-2H-benzo[*g*]chromen-3-yl)-1-methylpyridinium trifluoromethanesulfonate (Py<sup>+</sup>BC680a)**. Starting from **PyBC580a** (30 mg, 0.095 mmol), this compound was prepared as a red-violet solid (37 mg, 81%). mp 319°C, <sup>1</sup>H NMR (300 MHz, DMSO-*d*<sub>6</sub>, 298 K):  $\delta$  8.97 (d, *J* = 7.2 Hz, 2H), 8.90 (s, 1H), 8.53 (d, *J* = 7.2 Hz, 2H), 8.25 (s, 1H), 7.96 (d, *J* = 9.3 Hz, 1H), 7.58 (s, 1H), 7.30 (dd, *J* = 9.3, 2.4 Hz, 1H), 6.99 (d, *J* = 2.4 Hz, 1H), 4.33 (s, 3H), 3.13 (s, 6H). <sup>13</sup>C NMR (500 MHz, DMSO-*d*<sub>6</sub>, 298 K):  $\delta$  159.0, 150.7, 150.7, 150.2, 146.7, 144.9, 138.1, 131.3, 130.6, 130.1, 125.0, 123.1, 117.0, 116.4, 114.7, 108.7, 103.6, 47.2. IR (KBr):  $\nu$  = 3127, 3048, 1701, 1644, 1615, 1580, 1554, 1507, 1472, 1440, 1392, 1323, 1299, 1260, 1223, 1198, 1182, 1141, 1060, 1029 cm<sup>-1</sup>. HRMS (ESI) *m/z*: [M + H]<sup>+</sup> calcd for C<sub>21</sub>H<sub>19</sub>N<sub>2</sub>O<sub>2</sub>, 331.1447; found, 331.1447.

**8-(Allyl(methyl)amino)-3-(pyridin-4-yl)-2H-benzo[*g*]chromen-2-one (PyBC580b)**. Starting from 6-(allyl(methyl)amino)-3-hydroxy-2-naphthaldehyde (130 mg, 0.54 mmol), this compound was synthesized as an orange solid (144 mg, 78%). <sup>1</sup>H NMR (300 MHz, CDCl<sub>3</sub>, 298 K):  $\delta$  8.69 (d, *J* = 5.7 Hz, 2H), 8.00 (s, 1H), 7.89 (s, 1H), 7.76 (d, *J* = 9.3 Hz, 1H), 7.69 (d, *J* = 5.7 Hz, 2H), 7.47 (s, 1H), 7.12 (dd, *J* = 9.3, 2.4 Hz, 1H), 6.85 (d, *J* = 2.4 Hz, 1H), 5.96–5.84 (m, 1H), 5.24–5.16 (m, 2H), 4.10 (d, *J* = 4.8 Hz, 2H), 3.13 (s, 3H). <sup>13</sup>C NMR (300 MHz, CDCl<sub>3</sub> + MeOD, 298 K):  $\delta$  160.6, 150.9, 149.5, 149.2, 143.6, 142.7, 137.6, 132.7, 130.0, 129.1, 123.7, 123.0, 121.6, 116.5, 116.3, 115.3, 109.6, 103.9, 54.8, 38.2. HRMS (ESI) *m/z*: [M + H]<sup>+</sup> calcd for C<sub>22</sub>H<sub>18</sub>N<sub>2</sub>O<sub>2</sub>, 342.1368; found, 343.1447.

**4-(8-(Allyl(methyl)amino)-2-oxo-2H-benzo[*g*]chromen-3-yl)-1-methylpyridinium trifluoromethanesulfonate (Py<sup>+</sup>BC680b)**. Starting from **PyBC580b** (44 mg, 0.13 mmol), this compound was prepared as a red-violet solid (58 mg, 88%). mp 246 °C, <sup>1</sup>H NMR (600 MHz, DMSO-*d*<sub>6</sub>, 298 K):  $\delta$  8.98 (d, *J* = 6.6 Hz, 2H), 8.90 (s, 1H), 8.54 (d, *J* = 6.6 Hz, 2H), 8.25 (s, 1H), 7.94 (d, *J* = 9.0

Hz, 1H), 7.58 (s, 1H), 7.28 (dd,  $J = 9.0, 2.4$  Hz, 1H), 7.02 (d,  $J = 2.4$  Hz, 1H), 5.94–5.89 (m, 1H), 5.20–5.15 (m, 2H), 4.34 (s, 3H), 4.18 (d,  $J = 4.8$  Hz, 2H), 3.12 (s, 3H).  $^{13}\text{C}$  NMR (600 MHz, DMSO- $d_6$ , 298 K):  $\delta$  159.5, 151.2, 150.7, 150.3, 147.2, 145.4, 138.7, 133.8, 131.7, 131.0, 125.6, 123.7, 117.6, 117.0, 116.7, 115.2, 109.2, 104.1, 54.4, 47.7, 38.6. IR (KBr):  $\nu = 3125, 3047, 1701, 1640, 1623, 1579, 1550, 1494, 1436, 1395, 1325, 1305, 1260, 1224, 1202, 1185, 1140$   $\text{cm}^{-1}$ . HRMS (ESI)  $m/z$ :  $[\text{M} + \text{H}]^+$  calcd for  $\text{C}_{23}\text{H}_{21}\text{N}_2\text{O}_2$ , 357.1603; found, 357.1603.

**8-(Methylamino)-3-(pyridin-4-yl)-2H-benzo[g]chromen-2-one (PyBC560a).** A solution of 3-hydroxy-6-(methylamino)-2-naphthaldehyde (50 mg, 0.25 mmol)<sup>1</sup> and ethyl 4-pyridylacetate (45.6  $\mu\text{L}$ , 0.30 mmol) in ethanol (2.5 mL) was treated with 2 drops of piperidine, and the resulting solution was stirred for 8 h at 70 °C. After being cooled to room temperature, the reaction mixture concentrated under reduced pressure. The residue was treated with a mixture of methanol and hexane (1:9) to give **PyBC560a** as an orange precipitate, which was filtered and dried (57 mg, 76%).  $^1\text{H}$  NMR (300 MHz, DMSO- $d_6$ , 298 K):  $\delta$  8.65 (d,  $J = 6.2$  Hz, 2H), 8.49 (s, 1H), 8.11 (s, 1H), 7.78 (d,  $J = 6.2$  Hz, 2H), 7.51 (s, 1H), 6.99 (dd,  $J = 9.0, 2.0$  Hz, 1H), 6.70 (d,  $J = 2.0$ , 1H), 6.66 (dd,  $J = 9.0, 5.1$ , 1H), 2.82 (d,  $J = 5.1$  Hz, 3H).  $^{13}\text{C}$  NMR (600 MHz, DMSO- $d_6$ , 298 K):  $\delta$  160.0, 151.3, 150.6, 150.1, 143.5, 143.0, 138.4, 130.1, 130.0, 124.0, 123.1, 121.2, 119.3, 115.0, 108.8, 100.6, 29.9. HRMS (ESI)  $m/z$ :  $[\text{M} + \text{H}]^+$  calcd for  $\text{C}_{19}\text{H}_{14}\text{N}_2\text{O}_2$ , 302.1060; found, 303.1134.

**1-Methyl-4-(8-(methylamino)-2-oxo-2H-benzo[g]chromen-3-yl)pyridinium trifluoromethanesul-fonate (Py<sup>+</sup>BC660a).** Starting from **PyBC560a** (40 mg, 0.13 mmol), this compound was prepared as a red solid (52 mg, 84%). mp 311 °C,  $^1\text{H}$  NMR (300MHz, DMSO- $d_6$ , 298 K):  $\delta$  8.94 (d,  $J = 7.0$  Hz, 2H), 8.85 (s, 1H), 8.51 (d,  $J = 7.0$  Hz, 2H), 8.13 (s, 1H), 7.79 (d,  $J = 9.1$  Hz, 1H), 7.45 (s, 1H), 6.99 (dd,  $J = 9.1, 2.0$  Hz, 1H), 6.69 (d,  $J = 2.0$  Hz, 1H), 4.32 (s, 3H), 2.83 (s, 3H).  $^{13}\text{C}$  NMR (300 MHz, DMSO- $d_6$ , 298 K):  $\delta$  159.1, 150.9, 150.9, 150.2, 146.8, 144.8, 139.1, 131.3, 130.3, 124.9, 123.6, 119.1, 116.4, 114.1, 108.3, 100.2, 47.1, 29.3. IR (KBr):  $\nu = 3566, 3006, 2990, 1715, 1623, 1586, 1520, 1504, 1475, 1276, 1260, 1168, 1031$   $\text{cm}^{-1}$ . HRMS (ESI)  $m/z$ :  $[\text{M} + \text{H}]^+$  calcd for  $\text{C}_{20}\text{H}_{17}\text{N}_2\text{O}_2$ , 317.1285; found, 317.1290.

**8-Amino-3-(pyridin-4-yl)-2H-benzo[g]chromen-2-one (PyBC560b).** Starting from 6-(allylamino)-3-hydroxy-2-naphthaldehyde (100 mg, 0.44 mmol), which was synthesized by following the reported procedure by us,<sup>1</sup> 8-(allylamino)-3-(pyridin-4-yl)-2H-benzo[g]chromen-2-one (**N-allyl-PyBC**) was synthesized as an orange solid (120 mg, 84%).  $^1\text{H}$  NMR (300 MHz,  $\text{CDCl}_3$ , 298 K):  $\delta$  8.55 (d,  $J = 5.9$  Hz, 2H), 8.00 (s, 1H), 7.84 (s, 1H), 7.68 (d,  $J = 5.9$  Hz, 2H), 7.64 (d,  $J = 9.0$  Hz, 1H), 7.38 (s, 1H), 6.88 (dd,  $J = 9.0, 1.8$  Hz, 1H), 6.69 (d,  $J = 1.8$  Hz, 1H), 5.98–5.90 (m, 1H), 5.31–5.17 (m, 2H), 3.86 (d,  $J = 5.0$  Hz, 2H).  $^{13}\text{C}$  NMR (500 MHz,  $\text{CDCl}_3 + \text{MeOD}$ , 298 K):  $\delta$  161.0, 151.1, 149.3, 148.5, 143.6, 142.8, 138.1, 134.3, 130.1, 129.2, 124.6, 123.1, 122.0, 118.9, 116.8, 115.3, 109.8, 102.6, 45.9. A solution of **N-allyl-PyBC** (50 mg, 0.15 mmol) in anhydrous methanol (2 mL) was added to a round bottom flask containing tetrakis(triphenylphosphine)palladium (17.6 mg, 0.015 mmol) and *N,N'*-dimethylbarbituric acid (71.2 mg, 0.46 mmol) under argon condition. The resulting solution was stirred for 5 h at 60 °C to afford the crude product as precipitates, which was purified by column chromatography on a short pad of silica gel (eluent:

MeOH/CH<sub>2</sub>Cl<sub>2</sub> = 1/9) to give **PyBC560b** as an orange solid (28 mg, 64%). <sup>1</sup>H NMR (500 MHz, DMSO-*d*<sub>6</sub>, 298 K): δ 8.66 (d, *J* = 3.6 Hz, 2H), 8.49 (s, 1H), 8.11 (s, 1H), 7.79 (m, 3H), 7.43 (s, 1H), 6.99 (dd, *J* = 8.7 2.2 Hz, 1H), 6.84 (d, *J* = 2.2 Hz, 1H), 6.04 (s, 2H). <sup>13</sup>C NMR (500 MHz, DMSO-*d*<sub>6</sub>, 298 K): δ 159.5, 150.6, 149.7, 149.6, 143.0, 137.5, 130.1, 129.6, 123.3, 122.5, 118.8, 114.5, 107.8, 104.0. HRMS (ESI) *m/z*: [M + H]<sup>+</sup> calcd for C<sub>18</sub>H<sub>12</sub>N<sub>2</sub>O<sub>2</sub>, 288.0899; found, 289.0977.

**4-(8-Amino-2-oxo-2H-benzo[*g*]chromen-3-yl)-1-methylpyridinium trifluoromethanesulfonate (Py<sup>+</sup>BC660b)**. Starting from **PyBC560b** (10 mg, 0.023 mmol), this compound was prepared as a red solid (7 mg, 67%). <sup>1</sup>H NMR (300 MHz, DMSO-*d*<sub>6</sub>, 298 K): δ 8.97 (d, *J* = 6.7 Hz, 2H), 8.90 (s, 1H), 8.54 (d, *J* = 6.7 Hz, 2H), 8.18 (s, 1H), 7.84 (d, *J* = 9.2 Hz, 1H), 7.46 (s, 1H), 7.01 (dd, *J* = 9.2 2.1 Hz, 1H), 6.84 (d, *J* = 2.1 Hz 1H), 6.33 (s, 2H), 4.32 (s, 3H). <sup>13</sup>C NMR (500 MHz, DMSO-*d*<sub>6</sub>, 298 K): δ 159.1, 150.8, 150.8, 150.3, 146.9, 144.9, 138.7, 131.5, 131.0, 125.0, 123.5, 119.1, 116.7, 114.2, 107.9, 104.0, 47.2. IR (KBr): ν = 3406, 3347, 3240, 3127, 1703, 1623, 1586, 1459, 1332, 1317, 1253, 1225, 1153, 1028 cm<sup>-1</sup>. HRMS (ESI) *m/z*: [M + H]<sup>+</sup> calcd for C<sub>19</sub>H<sub>15</sub>N<sub>2</sub>O<sub>2</sub>, 303.1133; found, 303.1134.

**4-(8-(Allyl(methyl)amino)-2-oxo-2H-benzo[*g*]chromen-3-yl)pyridine 1-oxide (Py<sup>+</sup>O<sup>-</sup>BC600)**. A solution of ethyl 2-(pyridin-4-yl)acetate (200 mg, 1.21 mmol) and meta-chloroperoxybenzoic acid (*m*CPBA, 418 mg, 2.42 mmol) in THF (2 mL) was stirred at room temperature for 10 h. The reaction mixture was concentrated under reduced pressure, and the crude product was purified by silica gel column chromatography (eluent: MeOH/CH<sub>2</sub>Cl<sub>2</sub> = 7/93) to afford 4-(2-ethoxy-2-oxoethyl)pyridine *N*-oxide (146 mg, 67%). A solution of 6-(allyl(methyl)amino)-3-hydroxy-2-naphthaldehyde (50 mg, 0.21 mmol) and 4-(2-ethoxy-2-oxoethyl)pyridine 1-oxide (45 mg, 0.25 mmol) in ethanol (1 mL) was treated with 2 drops of piperidine, and the resulting solution was stirred for 8 h at 30 °C. The reaction mixture was concentrated under reduced pressure, and the crude product was purified by silica gel column chromatography (eluent: MeOH/CH<sub>2</sub>Cl<sub>2</sub> = 3/97) to give **Py<sup>+</sup>O<sup>-</sup>BC600** as an orange solid (54 mg, 73%). mp 198 °C, <sup>1</sup>H NMR (300 MHz, CDCl<sub>3</sub>, 298 K): δ 8.24 (d, *J* = 7.2 Hz, 2H), 7.99 (s, 1H), 7.88 (s, 1H), 7.80–7.74(m, 3H), 7.45 (s, 1H), 7.12 (dd, *J* = 9.3 2.4 Hz, 1H), 6.84 (d, *J* = 2.4 Hz, 1H), 5.95–5.83 (m, 1H), 5.24–5.15 (m, 2H), 4.10 (d, *J* = 4.8 Hz, 2H), 3.13 (s, 3H). <sup>13</sup>C NMR (500 MHz, CDCl<sub>3</sub> + MeOD, 298 K): δ 160.4, 150.9, 149.7, 142.1, 138.8, 137.9, 135.2, 132.7, 130.2, 129.4, 125.3, 123.9, 119.7, 116.7, 116.5, 115.3, 109.8, 104.1, 54.9, 38.4. IR (KBr): ν = 3420, 3111, 3081, 2958, 2925, 2855, 1716, 1630, 1590, 1564, 1489, 1448, 1394, 1374, 1310, 1247 cm<sup>-1</sup>. HRMS (ESI) *m/z*: [M + H]<sup>+</sup> calcd for C<sub>22</sub>H<sub>18</sub>N<sub>2</sub>O<sub>3</sub>, 358.1317; found, 359.1396.

**7-(Diethylamino)-3-(pyridin-4-yl)-2H-chromen-2-one (PyC)**. A solution of 4-(diethylamino)salicylaldehyde (100 mg, 0.52 mmol) and ethyl 4-pyridylacetate (118 μL, 0.78 mmol) in ethanol (2 mL) was treated with 2 drops of piperidine, and the resulting mixture was stirred for 24 h at 70 °C. After being cooled to room temperature, the reaction mixture was concentrated under reduced pressure to give the crude product, which was purified by silica gel column chromatography (eluent: EtOAc/Hexane = 2/8) to afford **PyC** (72 mg, 47%) as a yellow solid. <sup>1</sup>H NMR (300 MHz, CDCl<sub>3</sub>, 298 K): δ 8.63 (d, *J* = 5.6 Hz, 2H), 7.85 (s, 1H), 7.68 (d, *J* = 5.6 Hz, 2H), 7.35 (d, *J* = 8.8 Hz, 1H), 6.62 (dd, *J* = 8.8 2.4 Hz, 1H), 6.52 (d, *J* = 2.4 Hz, 1H),

3.48–3.41 (q,  $J = 7.1$  Hz, 4H), 1.23 (t,  $J = 7.1$  Hz, 6H).  $^{13}\text{C}$  NMR (500 MHz,  $\text{CDCl}_3$ , 298 K):  $\delta$  161.0, 156.9, 151.6, 149.9, 143.7, 142.1, 129.8, 122.5, 117.3, 109.5, 108.8, 97.2, 45.2 (2 carbons), 12.6 (2 carbons).

## 2. Figures

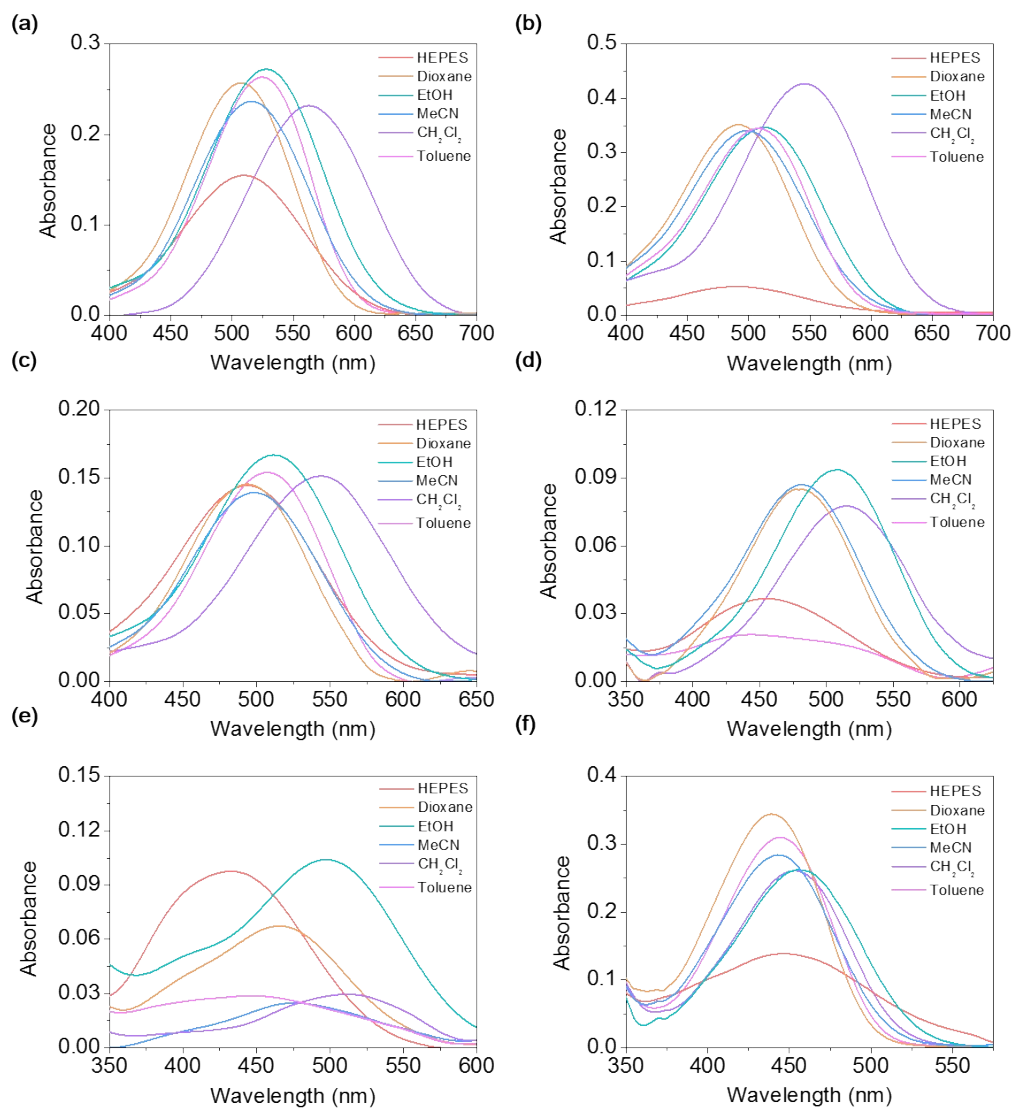

**Fig. S1.** UV/Vis absorption spectra of (a) **Py<sup>+</sup>BC690**, (b) **Py<sup>+</sup>BC680a**, (c) **Py<sup>+</sup>BC680b**, (d) **Py<sup>+</sup>BC660a**, (e) **Py<sup>+</sup>BC660b**, and (f) **Py<sup>+</sup>O-BC600**, measured in different solvents. All the measurements were conducted at 25 °C for each of the compounds (10  $\mu$ M) dissolved in the given solvent.

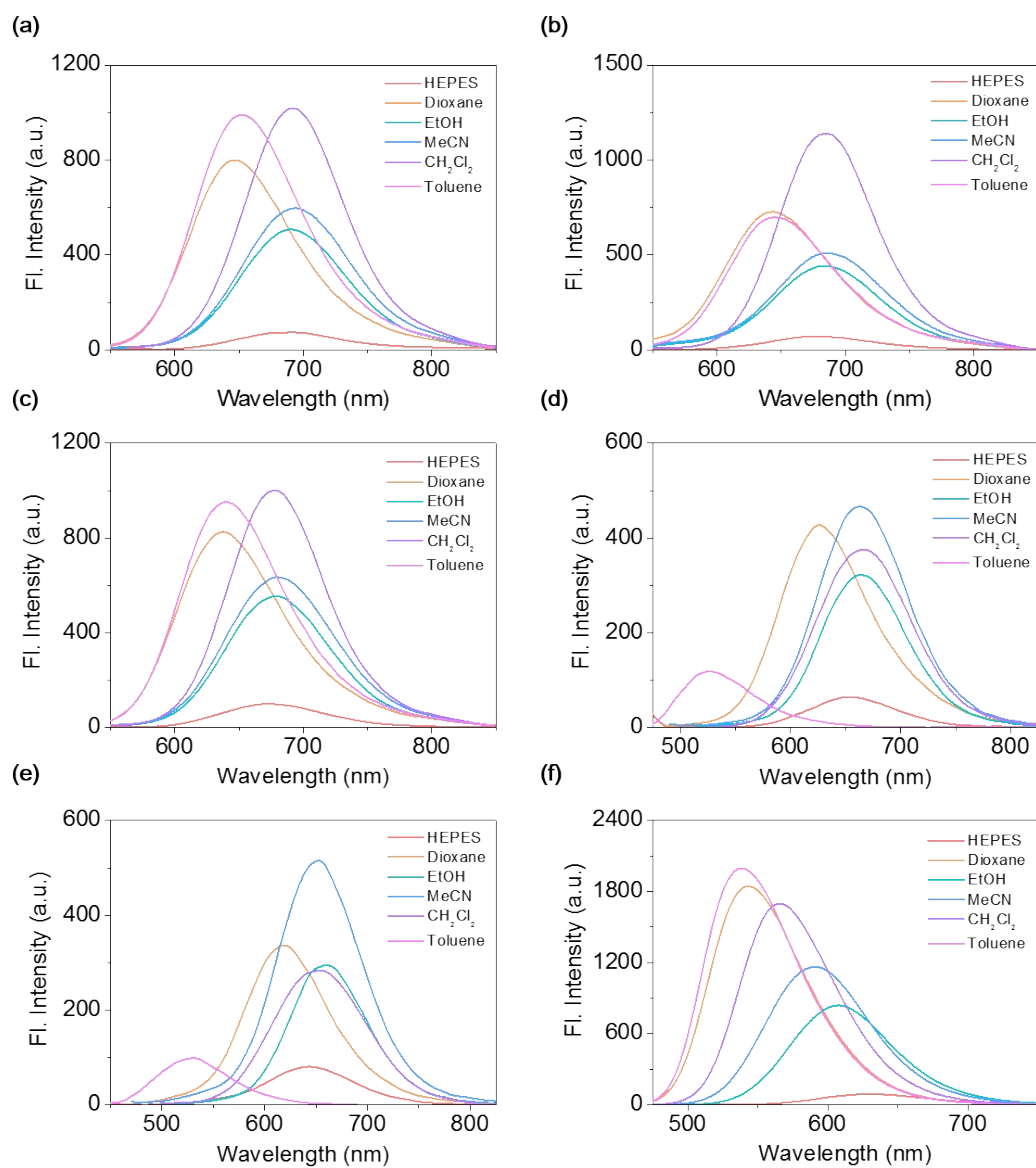

**Fig. S2.** Fluorescence emission spectra of (a) **Py<sup>+</sup>BC690**, (b) **Py<sup>+</sup>BC680a**, (c) **Py<sup>+</sup>BC680b**, (d) **Py<sup>+</sup>BC660a**, (e) **Py<sup>+</sup>BC660b**, and (f) **Py<sup>+</sup>OBC600**, measured in different solvents. All the measurements were conducted at 25 °C for each of the compounds (10 μM) dissolved in the given solvent. The fluorescence emission spectra were measured under excitation at the maximum absorption wavelength of each dye.



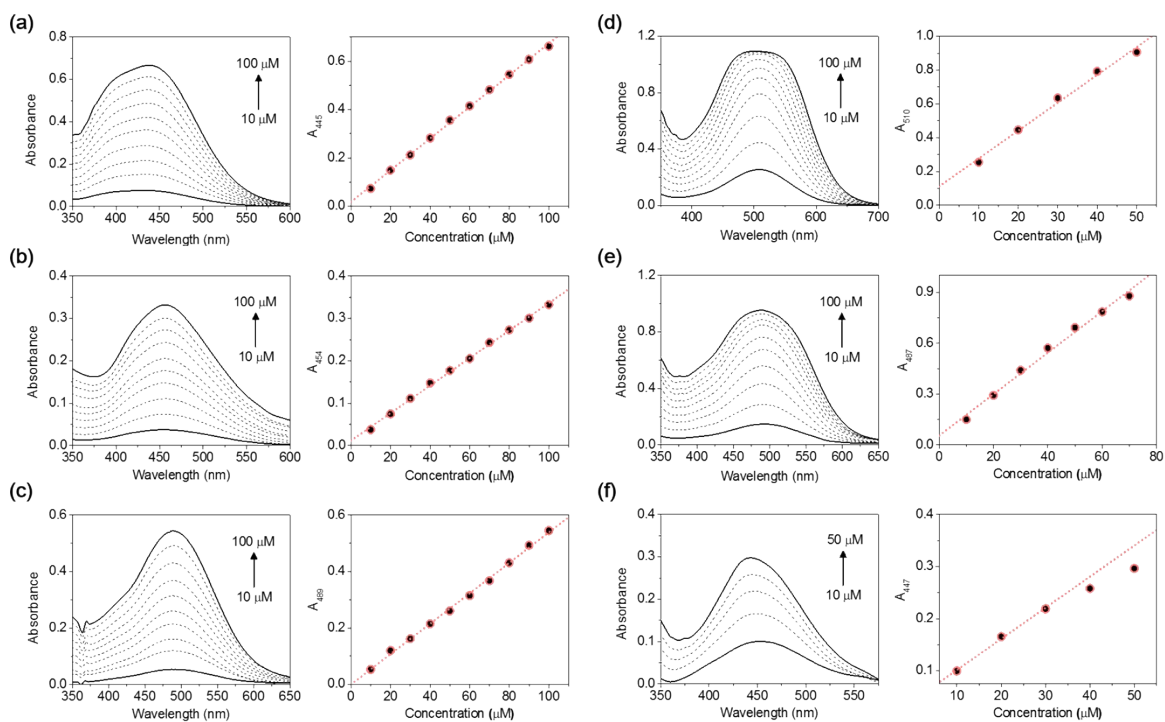

**Fig. S3.** UV/Vis absorption spectra of (a) **Py<sup>+</sup>BC690**, (b) **Py<sup>+</sup>BC680a**, (c) **Py<sup>+</sup>BC680b**, (d) **Py<sup>+</sup>BC660a**, (e) **Py<sup>+</sup>BC660b**, and (f) **Py<sup>+</sup>O-BC600**, at different concentrations (10–100  $\mu\text{M}$ ) in HEPES buffer (10 mM, pH 7.4,  $\leq$  1% DMSO). Note: We were able to measure the solubility of **Py<sup>+</sup>BC690** up to 50  $\mu\text{M}$  where the absorbance was saturated.

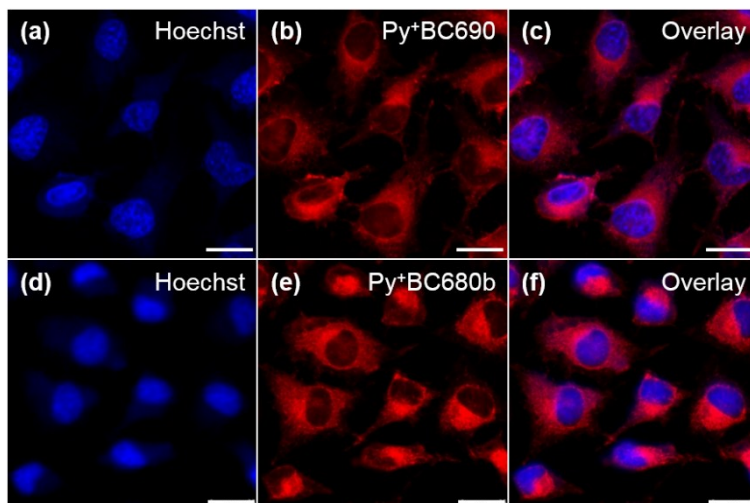

**Fig. S4.** 2PM imaging of HeLa cells incubated with **Py<sup>+</sup>BC** dyes. (a, d) Cell images stained with Hoechst 33342, a nucleus staining reference dye. (b, e) Cell images stained with **Py<sup>+</sup>BC690** and **Py<sup>+</sup>BC680b**, respectively. Concentration of dyes: 3  $\mu\text{g}/\text{mL}$  for the Hoechst dye; 10  $\mu\text{M}$  for **Py<sup>+</sup>BC** dyes. Excitation wavelengths: 405 nm for the Hoechst dye and 900 nm for the **Py<sup>+</sup>BC** dyes (under TPM). Emission wavelengths collected: 410–450 nm for the Hoechst dye; 565–675 nm for the **Py<sup>+</sup>BC** dyes.

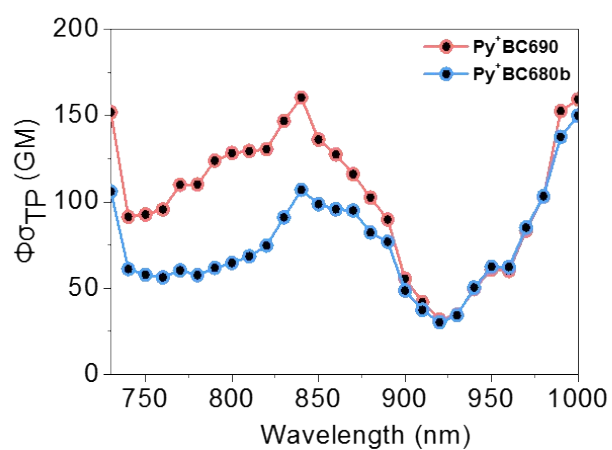

**Fig. S5.** Two-photon action spectra of **Py+BC690** and **Py+BC680b**. The two-photon action cross section (TPACS) values were measured for the **Py+BC** dyes at 100  $\mu\text{M}$  in DMSO using Rhodamine B (100  $\mu\text{M}$ ) in MeOH as a reference dye.

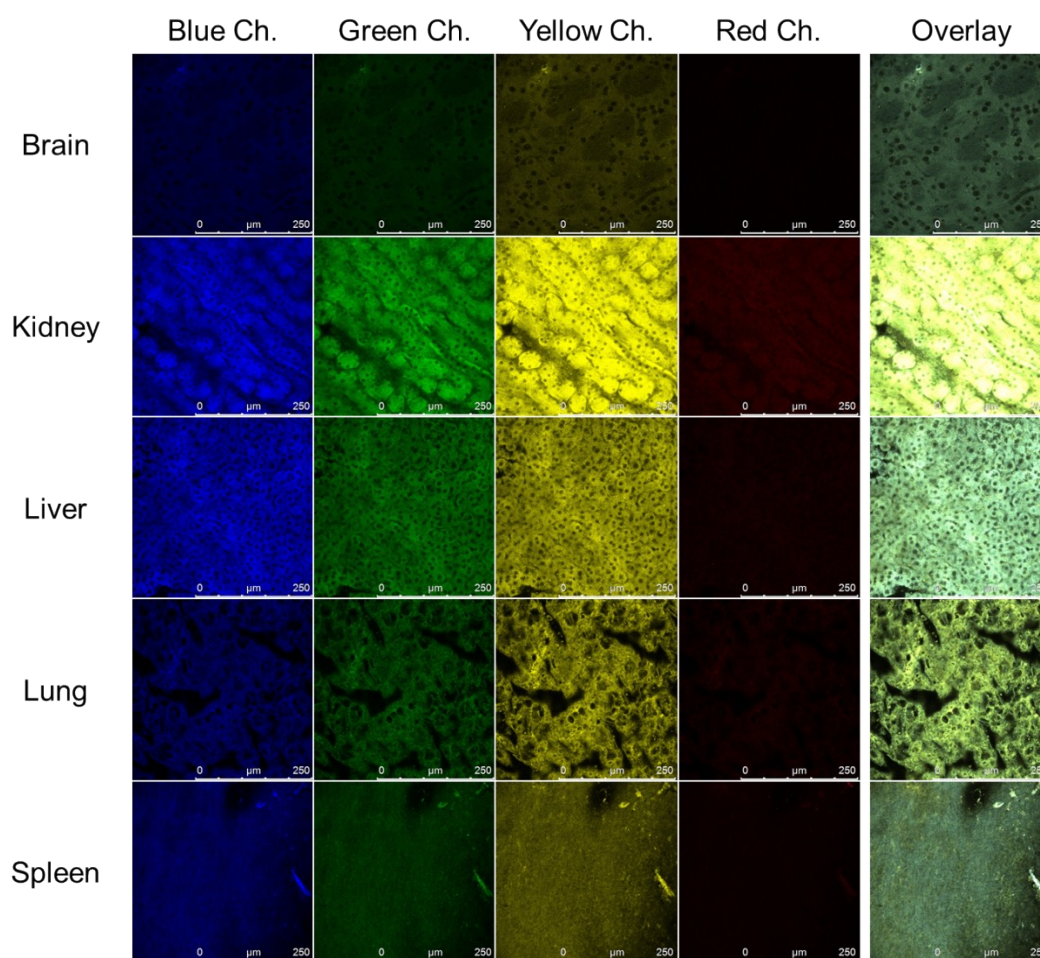

**Fig. S6.** Autofluorescence analysis for different tissues depending on the emission channels and kinds of tissues, measured under two-photon excitation at 850 nm.

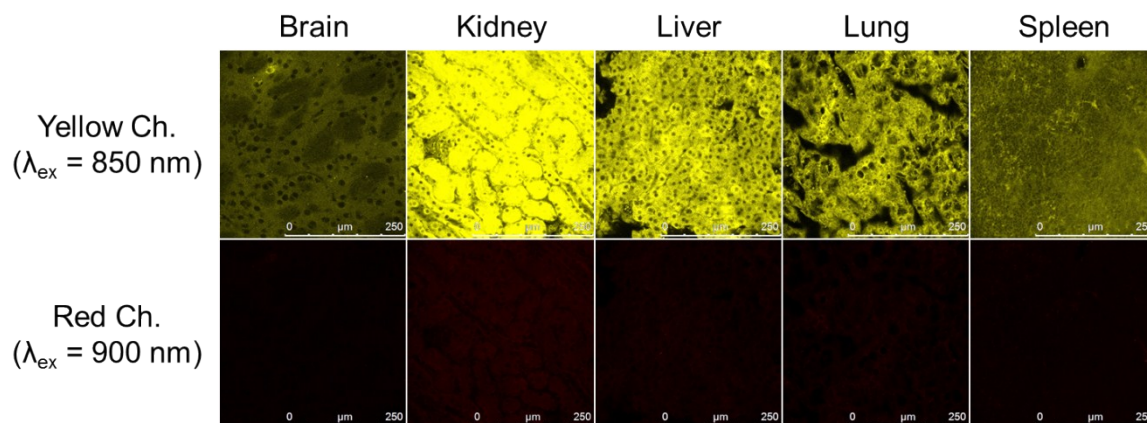

**Fig. S7.** Autofluorescence in tissue imaging dependent on the emission channels: between the yellow and red channels. The emission from the yellow channel was obtained under excitation at 850 nm and that from the red channel under excitation at 900 nm (at the doubled wavelength of the maximum absorption wavelength of the yellow or the red emitting dye).

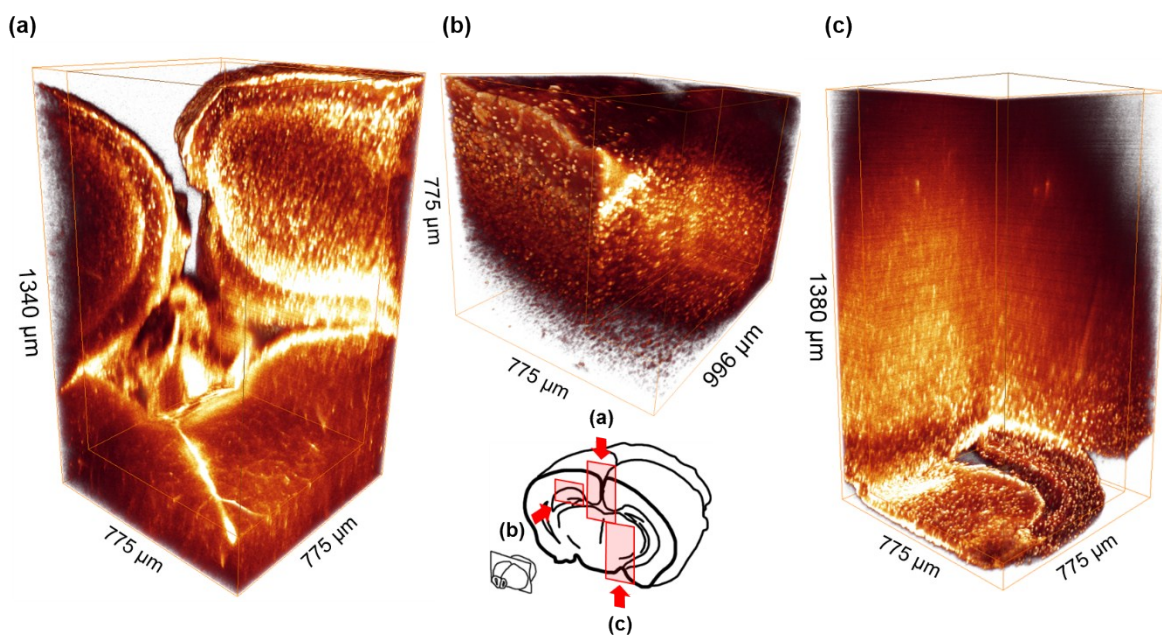

**Fig. S8.** 3D 2PM images of mouse brain tissue stained with **Py\*BC690** after the BABB clearance procedure. Corner cup images from the (a) top, (b) side, and (c) bottom, which were collected through the red channel (625–675 nm) at every 2  $\mu\text{m}$  of depth while excited at 900 nm. Laser power was gradually increased from 5 mW to 50 mW (compensation excitation).

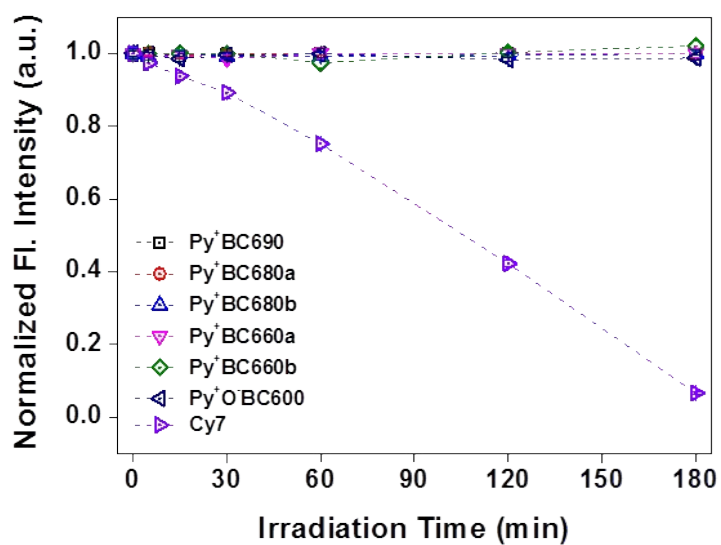

**Fig. S9.** Photostability spectra in time under UV irradiation (at 365 nm) with 10  $\mu$ M of dyes in EtOH. The fluorescence emission was measured under excitation at the maximum absorption wavelength of each dye.

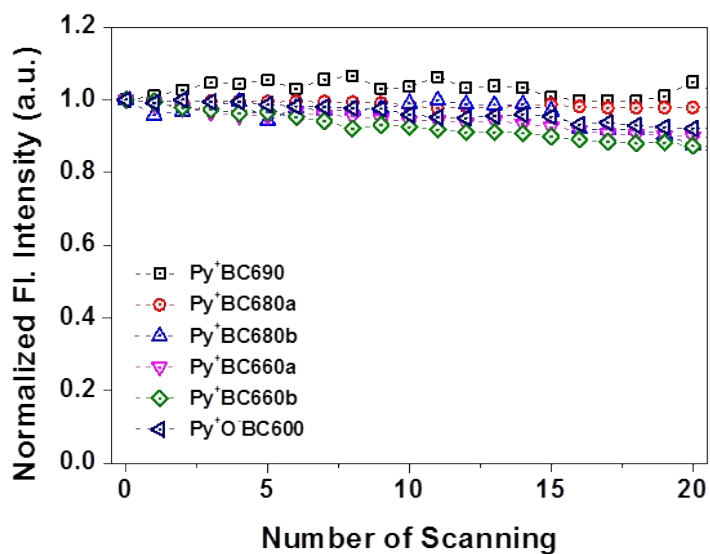

**Fig. S10.** Photostability spectra under two-photon excitation (900 nm) in HeLa cells incubated with 10  $\mu$ M of dyes. The fluorescence emission was collected in the range from 410 to 675 nm.

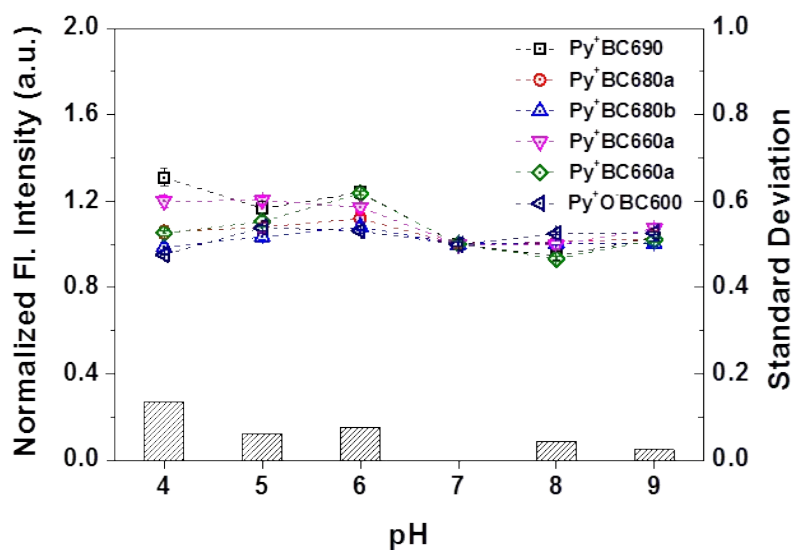

**Fig. S11.** Variation of fluorescent intensity depending on pH. Line and symbol indicate normalized fluorescent intensity (based on pH 7) on each pH and bar graph indicate the standard deviation of normalized fluorescent intensity. Measured in 1X universal buffer with 10  $\mu\text{M}$  of **Py\*BC** dyes.

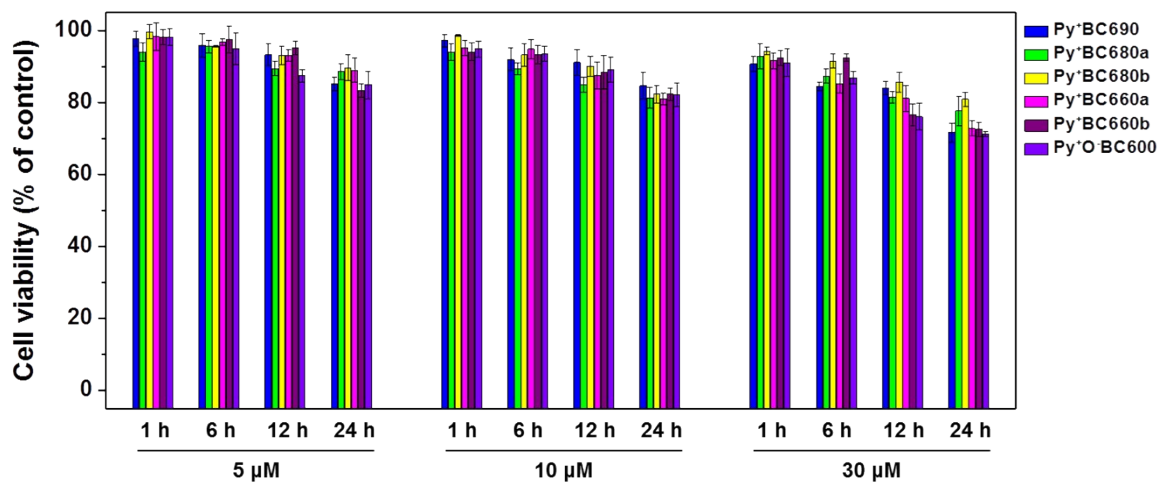

**Fig. S12.** Cell viability evaluation by CCK-8 assay with HeLa cells treated with **Py\*BC** dyes at various concentrations (5, 10, and 30  $\mu\text{M}$ ) within 24 h.

### 3. Tables

**Table S1.** Maximum absorbance wavelengths [ $\lambda_{\text{abs}}$  (nm)] of **Py<sup>+</sup>BC** derivatives in different solvents<sup>a</sup>

|                                 | Py <sup>+</sup> BC690 | Py <sup>+</sup> BC680a | Py <sup>+</sup> BC680b | Py <sup>+</sup> BC660a | Py <sup>+</sup> BC660b | Py <sup>+</sup> O BC600 |
|---------------------------------|-----------------------|------------------------|------------------------|------------------------|------------------------|-------------------------|
| HEPES buffer                    | 510                   | 489                    | 487                    | 454                    | 445                    | 447                     |
| Dioxane                         | 507                   | 492                    | 493                    | 475                    | 465                    | 440                     |
| EtOH                            | 527                   | 513                    | 515                    | 506                    | 499                    | 456                     |
| MeCN                            | 517                   | 500                    | 499                    | 483                    | 464                    | 445                     |
| CH <sub>2</sub> Cl <sub>2</sub> | 562                   | 546                    | 542                    | 517                    | 492                    | 456                     |
| DMSO                            | 513                   | 498                    | 499                    | 492                    | 490                    | 454                     |
| Toluene                         | 525                   | 506                    | 506                    | 435                    | 425                    | 447                     |

<sup>a</sup>All the measurements were conducted at 25 °C for each of the compounds (10  $\mu$ M) dissolved in the given solvent.

**Table S2.** Maximum emission wavelengths [ $\lambda_{\text{em}}$  (nm)] of **Py<sup>+</sup>BC** derivatives in different solvents<sup>a</sup>

|                                 | Py <sup>+</sup> BC690 | Py <sup>+</sup> BC680a | Py <sup>+</sup> BC680b | Py <sup>+</sup> BC660a | Py <sup>+</sup> BC660b | Py <sup>+</sup> O BC600 |
|---------------------------------|-----------------------|------------------------|------------------------|------------------------|------------------------|-------------------------|
| HEPES buffer                    | 689                   | 678                    | 675                    | 657                    | 645                    | 630                     |
| Dioxane                         | 647                   | 643                    | 637                    | 626                    | 619                    | 543                     |
| EtOH                            | 691                   | 681                    | 680                    | 663                    | 660                    | 606                     |
| MeCN                            | 694                   | 685                    | 680                    | 663                    | 651                    | 591                     |
| CH <sub>2</sub> Cl <sub>2</sub> | 694                   | 685                    | 678                    | 666                    | 656                    | 565                     |
| DMSO                            | 700                   | 664                    | 686                    | 673                    | 664                    | 605                     |
| Toluene                         | 652                   | 645                    | 640                    | 526                    | 530                    | 538                     |

<sup>a</sup>All the measurements were conducted at 25 °C for each of the compounds (10  $\mu$ M) dissolved in the given solvent. The fluorescence emission spectra were measured under the excitation at the maximum absorption wavelength of each dye.

**Table S3.** Molar extinction coefficients [ $\epsilon$  (Lmol<sup>-1</sup>cm<sup>-1</sup>)] of **Py<sup>+</sup>BC** derivatives in different solvents

|                                 | Py <sup>+</sup> BC690 | Py <sup>+</sup> BC680a | Py <sup>+</sup> BC680b | Py <sup>+</sup> BC660a | Py <sup>+</sup> BC660b | Py <sup>+</sup> O BC600 |
|---------------------------------|-----------------------|------------------------|------------------------|------------------------|------------------------|-------------------------|
| HEPES buffer                    | 15991                 | 5307                   | 14761                  | 3755                   | 10477                  | 14085                   |
| Dioxane                         | 26033                 | 35259                  | 17094                  | 11566                  | 7070                   | 25332                   |
| EtOH                            | 27577                 | 34818                  | 17258                  | 12915                  | 11593                  | 35464                   |
| MeCN                            | 24167                 | 34174                  | 15618                  | 10380                  | 9773                   | 21073                   |
| CH <sub>2</sub> Cl <sub>2</sub> | 22311                 | 42870                  | 17441                  | 7803                   | 6594                   | 31209                   |
| DMSO                            | 23402                 | 32800                  | 15234                  | 8972                   | 4938                   | 33535                   |
| Toluene                         | 26554                 | 34615                  | 16971                  | 1531                   | 1686                   | 41244                   |

**Table S4.** Quantum yields ( $\Phi_f$ ) of **Py<sup>+</sup>BC** derivatives in different solvents

|                                 | Py <sup>+</sup> BC690 | Py <sup>+</sup> BC680a | Py <sup>+</sup> BC680b | Py <sup>+</sup> BC660a | Py <sup>+</sup> BC660b | Py <sup>+</sup> O-BC600 |
|---------------------------------|-----------------------|------------------------|------------------------|------------------------|------------------------|-------------------------|
| Water                           | 0.007                 | 0.009                  | 0.013                  | 0.013                  | 0.013                  | 0.085                   |
| EtOH                            | 0.029                 | 0.060                  | 0.068                  | 0.058                  | 0.044                  | 0.097                   |
| MeCN                            | 0.048                 | 0.070                  | 0.063                  | 0.070                  | 0.063                  | 0.398                   |
| CH <sub>2</sub> Cl <sub>2</sub> | 0.037                 | 0.082                  | 0.072                  | 0.073                  | 0.054                  | 0.489                   |
| DMSO                            | 0.022                 | 0.034                  | 0.047                  | 0.041                  | 0.035                  | 0.243                   |

**Table S5.** Photophysical properties of two-photon absorbing red and far-red emitting dyes.
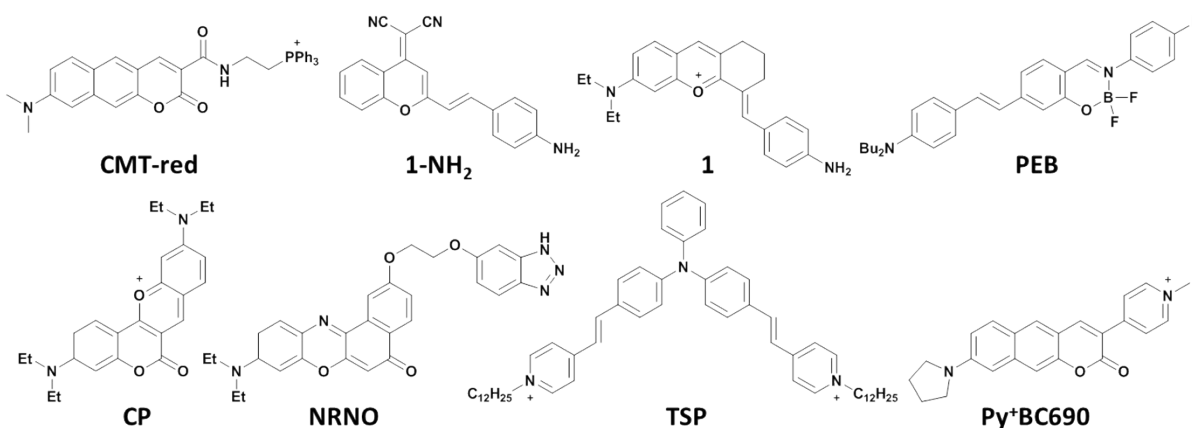

| Name                       | $\lambda_{em}$ (nm)    | $\delta\Phi$ (GM)      | M.W.         | Photo-stability ( $t_{1/2}$ ) | Water Solubility                 |
|----------------------------|------------------------|------------------------|--------------|-------------------------------|----------------------------------|
| <b>CMT-red</b>             | 626 <sup>a</sup>       | 50 <sup>b</sup>        | 650.1        | 1200 sec <sup>g</sup>         | 6 $\mu$ M                        |
| <b>1-NH<sub>2</sub></b>    | 670 <sup>f</sup>       | 50 <sup>e</sup>        | <b>311.1</b> | <b>Stable<sup>i</sup></b>     | n.d.                             |
| <b>1</b>                   | <b>725<sup>a</sup></b> | <b>180<sup>a</sup></b> | <b>359.2</b> | <b>Stable<sup>i</sup></b>     | n.d.                             |
| <b>PEB</b>                 | 617 <sup>a</sup>       | <b>290<sup>d</sup></b> | 492.3        | n.d.                          | n.d.                             |
| <b>CP</b>                  | 645 <sup>a</sup>       | n.d.                   | 393.2        | n.d.                          | n.d.                             |
| <b>NRNO</b>                | 650 <sup>a</sup>       | 38 <sup>a</sup>        | 497.2        | n.d.                          | n.d.                             |
| <b>TSP</b>                 | 610 <sup>a</sup>       | 0.03 <sup>c</sup>      | 789.6        | 900 sec <sup>g</sup>          | n.d.                             |
| <b>Py<sup>+</sup>BC690</b> | <b>700<sup>e</sup></b> | <b>150<sup>e</sup></b> | <b>357.2</b> | <b>Stable<sup>g,h</sup></b>   | <b>&gt;100 <math>\mu</math>M</b> |

Measured in <sup>a</sup>aqueous buffer, <sup>b</sup>Dioxane, <sup>c</sup>MeOH, <sup>d</sup>toluene, <sup>e</sup>DMSO, and <sup>f</sup>aqueous/organic mixture (50:50). Irradiated under <sup>g</sup>two-photon excitation, <sup>h</sup>UV (365 nm), <sup>i</sup>mercury lamp (100 W), and <sup>t</sup>tungsten lamp (500 W). n.d.; not determined.

#### 4. Notes

##### Fluorescence quantum yield measurement.

The fluorescence quantum yields were measured by using rhodamine 6G in ethanol as a reference. The sample solutions were excited by a laser light at the wavelengths tuned to 500, 510, and 520 nm, and fluorescence was detected by a spectrograph equipped with a CCD detector. The full emission spectra were measured and integrated to give the quantum yields. After confirming no uncertainty in the calculated quantum yield of rhodamine 6G compared with the literature values (literature quantum yield is 0.91<sup>2</sup>), we measured the quantum yields of all the **Py<sup>+</sup>BC** derivatives using rhodamine 6G as a reference. The quantum yields of the compounds in various solvents were calculated according to **Equation S1** as below. Where  $\Phi$  is the quantum yield,  $r$  represents references,  $I$  is the measured integrated emission intensity,  $n$  is the refractive index, and  $A$  is the optical density

$$\Phi = \Phi_r \times \frac{A_r}{I_r} \times \frac{I}{A} \times \frac{n^2}{n_r^2} \quad (S1)$$

**Determination of two-photon action cross-section value.** TPACS values were measured following the known method.<sup>3,4</sup> Two equations are referred from the references as below.

$$\frac{\langle F(t) \rangle_{cal}}{\langle F(t) \rangle_{new}} = \frac{\Phi_{cal} \eta_{2cal} \sigma_{2cal} C_{cal} \langle P_{cal}(t) \rangle^2 n_{cal}}{\Phi_{new} \eta_{2new} \sigma_{2new} C_{new} \langle P_{new}(t) \rangle^2 n_{new}} \quad (S2)$$

The Equation S2 is the main equation that calculates TPACS using a reference dye and Equation S3 could be extracted from Equation S2.

$$\sigma_{2new}(\lambda) \eta_{2new} = \frac{\Phi_{cal} \eta_{2cal} \sigma_{2cal}(\lambda) C_{cal} \langle P_{cal}(t) \rangle^2 \langle F(t) \rangle_{new} n_{cal}}{\Phi_{new} C_{new} \langle P_{new}(t) \rangle^2 \langle F(t) \rangle_{cal} n_{new}} \quad (S3)$$

( $\sigma_2$  = two-photon absorption cross section;  $\eta$  = quantum efficiency;  $\sigma_{TPE}$  (two photon action cross section) =  $\sigma\eta$ ;  $\langle F(t) \rangle$  = time averaged fluorescence emission;  $C$  = fluorophore concentration;  $\langle P(t) \rangle$  = time averaged laser power;  $n$  = refractive index of sample;  $\Phi$  = fluorescence collection efficiency)

$\Phi_{cal}$  and  $\Phi_{new}$  are identical in the same experimental setup, and  $\langle P_{cal}(t) \rangle$ ,  $\langle P_{new}(t) \rangle$  are also identical when same laser is applied. TPACS values of samples could be calculated by putting values of known TPACS (two-photon action cross section) ( $\sigma\eta$ ), concentration ( $C$ ), detected emission ( $\langle F(t) \rangle$ ), and known refractive index ( $n$ ) into either of the two equations.

Rhodamine B in methanol (100  $\mu$ M) was used as a reference, and 100  $\mu$ M of **Py<sup>+</sup>BC690** or **Py<sup>+</sup>BC680b** in DMSO was used for the measurements. Each refractive index of a given solvent was applied (assuming that the refractive index of sample is almost the same as that of pure solvent). 100  $\mu$ L of a sample was loaded in the well slide and covered with cover glass. The edge of cover glass was coated with transparent manicure to prevent the evaporation of solvent and then mounted on a vibration isolation table. Two-photon excitation was performed with a Ti-sapphire laser (Chameleon Vision II, Coherent) at 140 fs pulse width and 80 MHz pulse repetition rate. The emission intensity was collected through an HCX APO 10 $\times$  objective lens (Leica,



Germany) of a two-photon microscopy (TCS SP5 II, Leica, Germany) equipped with HyD detector (Leica, Germany).

**Cell viability evaluation.** Cell viability was assessed by measuring their ability to metabolize CCK-8 (Cell Counting Kit-8, Dojindo molecular technologies, Inc.) in HeLa cell line. Cells were seeded into 96-well plates at a density of  $5 \times 10^3$  cells per well in Dulbecco's Modified Eagle's Medium (DMEM) and incubated at 37 °C for 24 h in a humidified atmosphere of 5% CO<sub>2</sub> in the air. The **Py<sup>+</sup>BC** dyes at various concentrations (5, 10 and 30 μM) were added into the culture media in the plate and control group was treated with PBS buffer (10 mM, pH 7.4). The plates were incubated for 1, 6, 12 or 24 h and 10 μL of CCK-8 solution was added to each well of the plate. After incubation for 1 h, absorbance at 450 nm was measured using a microplate reader (Multiskan EX, Thermo Eletron). Results were expressed as a percentage in comparison to the absorbance of non-treated cells (Fig S12).

## 5. Reference

1. I. Kim, D. Kim, S. Sambasivan and K. H. Ahn, *Asian. J. Org. Chem.*, 2012, **1**, 60–64.
2. C. Würth, M. Grabolle, J. Pauli, M. Spieles and U. Resch-Genger, *Nat. Protoc.*, 2013, **8**, 1535–1550.
3. M. A. Albota, C. Xu and W. W. Webb, *Appl. Opt.*, 1998, **37**, 7352–7356.
4. C. Xu and W. W. Webb, *J. Opt. Soc. Am. B*, 1996, **13**, 481–491.

# 6. <sup>1</sup>H and <sup>13</sup>C NMR Spectra

Py<sup>+</sup>BC690

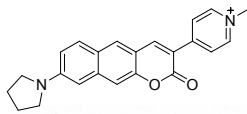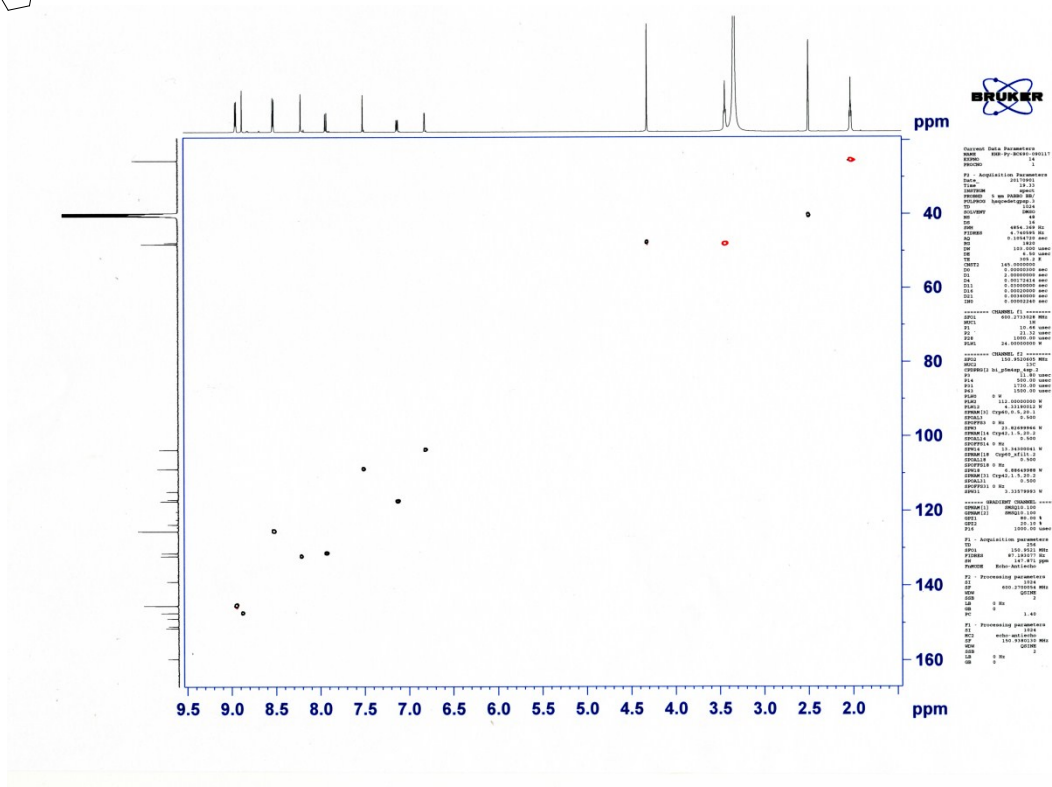

Py<sup>+</sup>BC680a

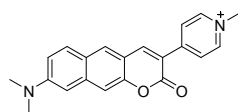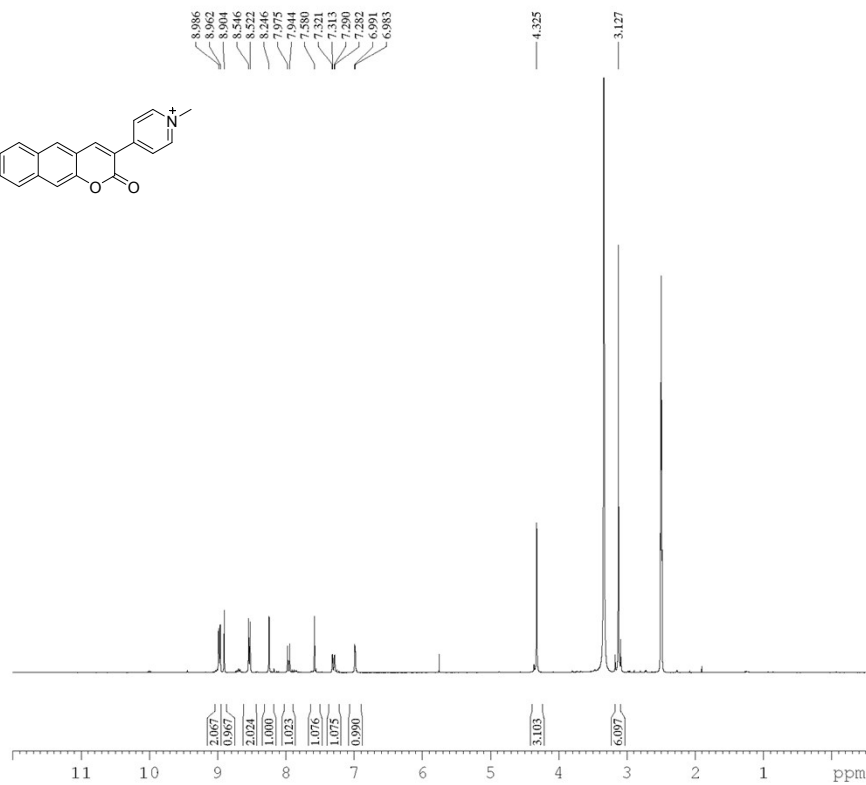

```

NAME      KHR_170830_Py+BC680a
EXPNO     1
PROCNO    1
Date_     20170830
Time      10.46
INSTRUM   spect
PROBHD    5 mm PABBO BB-
PULPROG   zg30
TD         65536
SOLVENT   DMSO
NS         128
DS         2
SWH        6188.119 Hz
FIDRES     0.094423 Hz
AQ         5.2953587 sec
RG         287
DW         80.800 usec
DE         6.50 usec
TE         295.0 K
D1         2.0000000 sec
D10        1
===== CHANNEL f1 =====
SFO1      300.1314684 MHz
NUC1       1H
P1         11.00 usec
SI         32768
SF         300.1300011 MHz
WDW        EM
SSB        0
LB         0.30 Hz
GB         0
PC         1.00
    
```

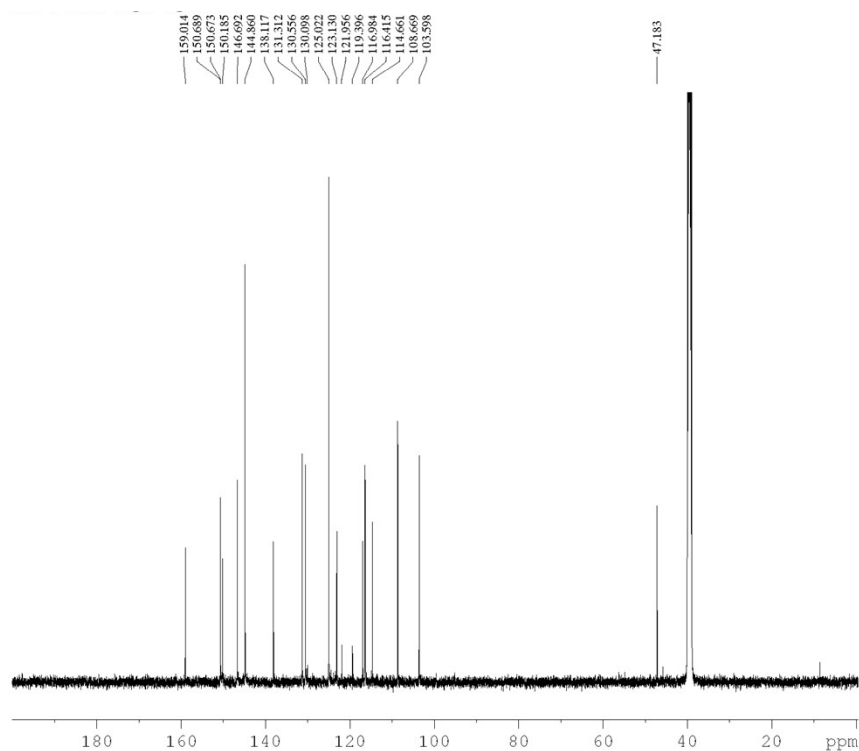

```

NAME      KHR_Py+BC680a_13C
EXPNO     14
PROCNO    1
Date_     20161023
Time      22.24
INSTRUM   spect
PROBHD    5 mm PABBO BB/
PULPROG   zgpg30
TD         65536
SOLVENT   DMSO
NS         10240
DS         4
SWH        29761.904 Hz
FIDRES     0.454131 Hz
AQ         1.1010548 sec
RG         2050
DW         16.800 usec
DE         6.50 usec
TE         295.3 K
D1         2.0000000 sec
D11        0.0300000 sec
D10        1
===== CHANNEL f1 =====
SFO1      125.8131145 MHz
NUC1       13C
P1         10.00 usec
SI         32768
SF         125.8005951 MHz
WDW        EM
SSB        0
LB         1.00 Hz
GB         0
PC         1.40
    
```

Py<sup>+</sup>BC680b

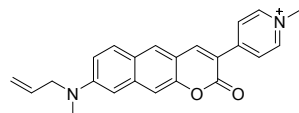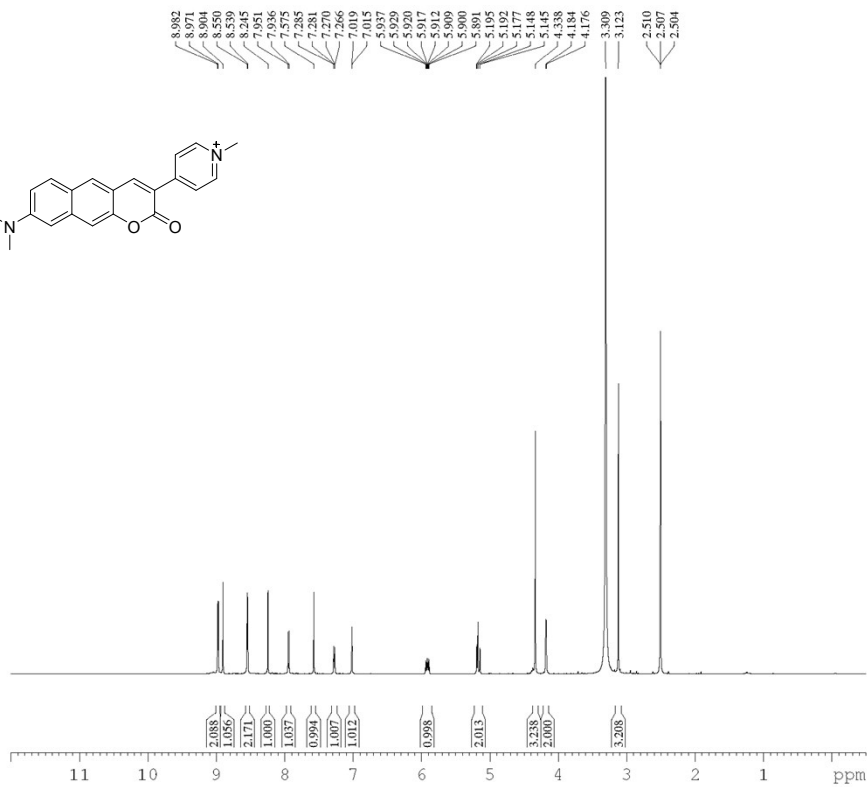

```

NAME      KHR-680b-170830
EXPNO    1
PROCNO   1
Date_    20170830
Time     17.21
INSTRUM  spect
PROBHD   5 mm FAPBO BB/
PULPROG  zg30
TD        65536
SOLVENT  DMSO
NS        256
DS        2
SWH       12335.526 Hz
FIDRES    0.188225 Hz
AQ        2.6564426 sec
RG        101
DW        40.533 usec
DE        6.50 usec
TE        306.2 K
D1        2.00000000 sec
TD0       1

===== CHANNEL f1 =====
SFO1     600.2737069 MHz
NUC1     1H
P1       10.75 usec
SI       65536
SF       600.2700000 MHz
WDW      EM
SSB      0
LB       0.30 Hz
GB       0
PC       1.00
    
```

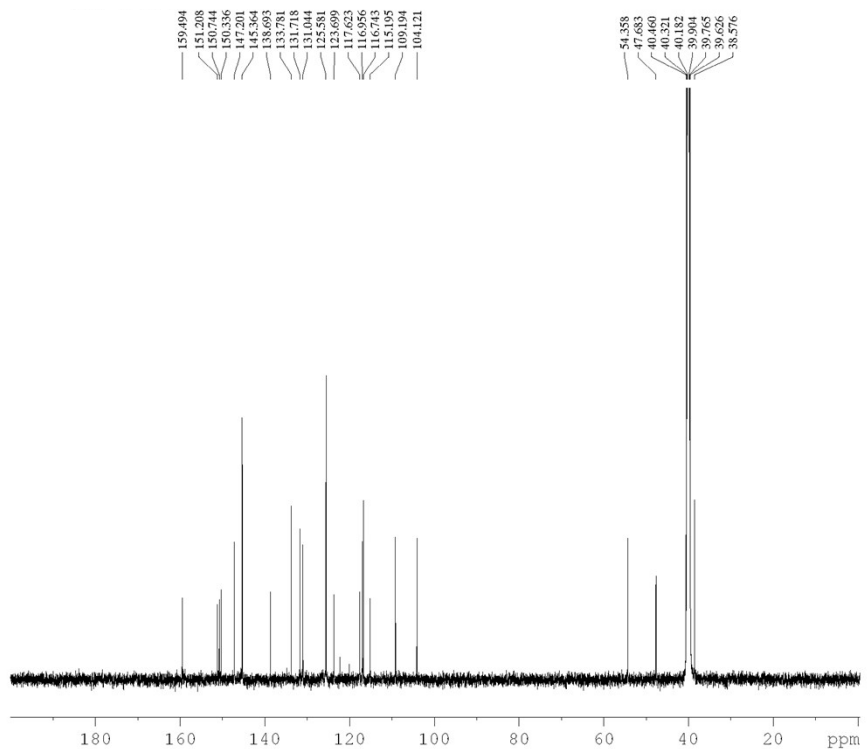

```

NAME      KHR-680b-170830
EXPNO    13
PROCNO   1
Date_    20170831
Time     2.37
INSTRUM  spect
PROBHD   5 mm FAPBO BB/
PULPROG  zg30
TD        65536
SOLVENT  DMSO
NS        8192
DS        4
SWH       36057.691 Hz
FIDRES    0.550197 Hz
AQ        0.9088159 sec
RG        1820
DW        13.867 usec
DE        6.50 usec
TE        305.1 K
D1        1.79999995 sec
D11      0.03000000 sec
TD0       1

===== CHANNEL f1 =====
SFO1     150.9531046 MHz
NUC1     13C
P1       11.80 usec
SI       32768
SF       150.9380130 MHz
WDW      EM
SSB      0
LB       2.00 Hz
GB       0
PC       1.40
    
```

Py<sup>+</sup>BC660a

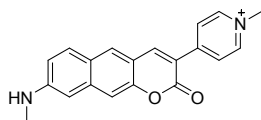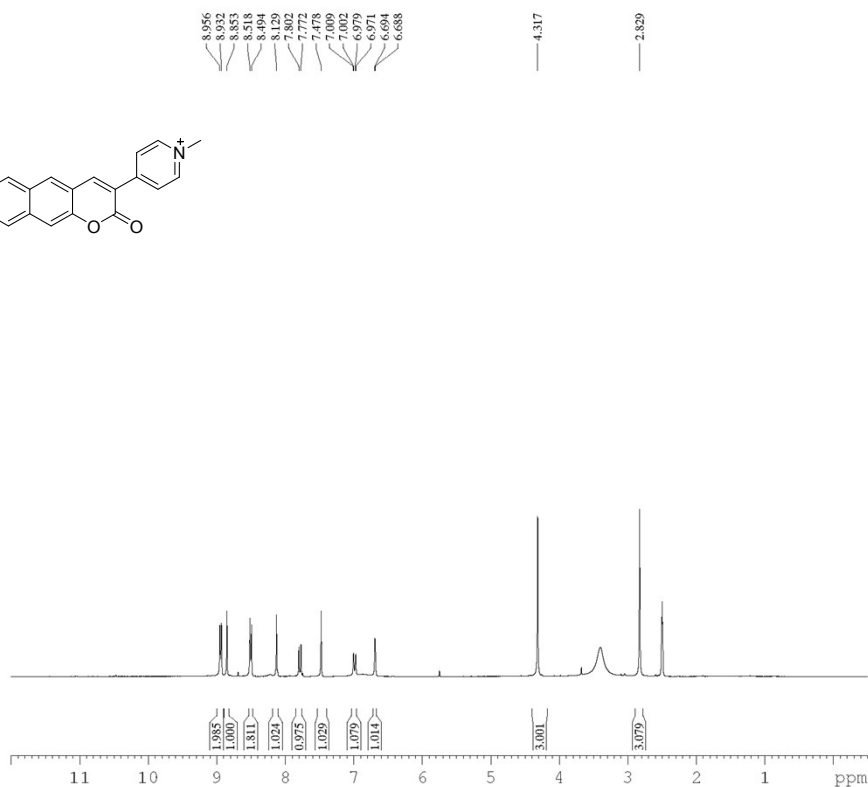

```

NAME      KHR_Py+BC660a_1H
EXPNO     1
PROCNO    1
Date_     20161020
Time      23.25
INSTRUM   spect
PROBHD    5 mm PABBO BB-
PULPROG   zg30
TD         65536
SOLVENT   DMSO
NS         64
DS         2
SWH        6188.119 Hz
FIDRES     0.094423 Hz
AQ          5.2953587 sec
RG          287
DW          80.800 usec
DE          6.50 usec
TE          295.6 K
D1          2.0000000 sec
TD0         1
    
```

---

```

===== CHANNEL f1 =====
SF01      300.1314684 MHz
NUC1       1H
P1         11.00 usec
SI         32768
SF         300.1300008 MHz
WDW        EM
SSB         0
LB          0.30 Hz
GB          0
PC          1.00
    
```

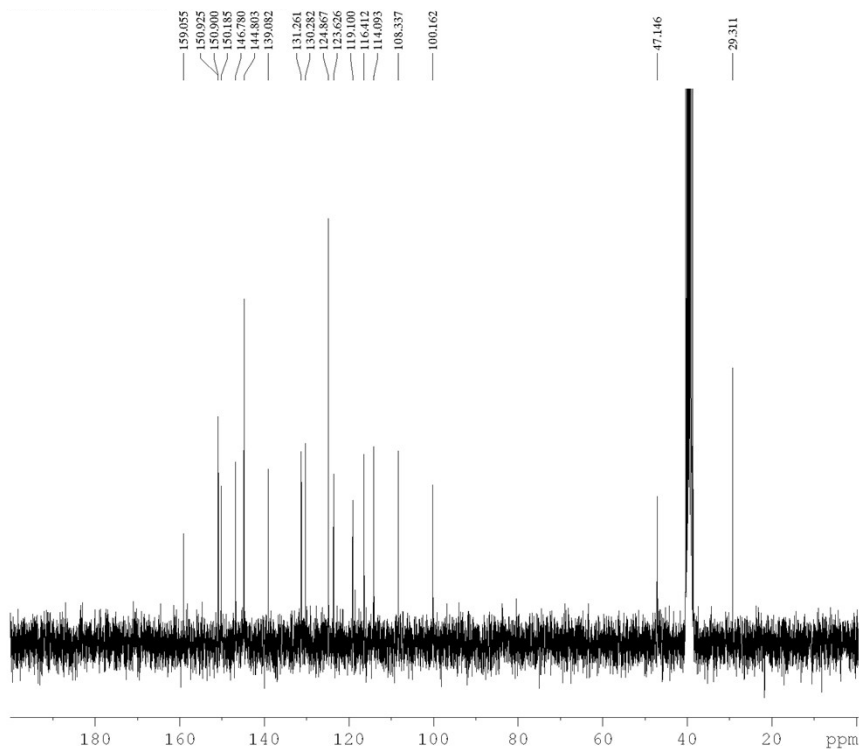

```

NAME      KHR_Py+BC660a_13C
EXPNO     1
PROCNO    1
Date_     20161020
Time      23.42
INSTRUM   spect
PROBHD    5 mm PABBO BB-
PULPROG   zgpg30
TD         65536
SOLVENT   DMSO
NS         10221
DS         2
SWH        18028.846 Hz
FIDRES     0.275098 Hz
AQ          1.8175818 sec
RG          20.2
DW          27.733 usec
DE          6.50 usec
TE          295.6 K
D1          1.5000000 sec
D11        0.0300000 sec
TD0         1
    
```

---

```

===== CHANNEL f1 =====
SF01      75.4752953 MHz
NUC1       13C
P1         10.20 usec
SI         32768
SF         75.4677829 MHz
WDW        EM
SSB         0
LB          1.00 Hz
GB          0
PC          1.40
    
```

Py<sup>+</sup>BC660b

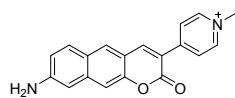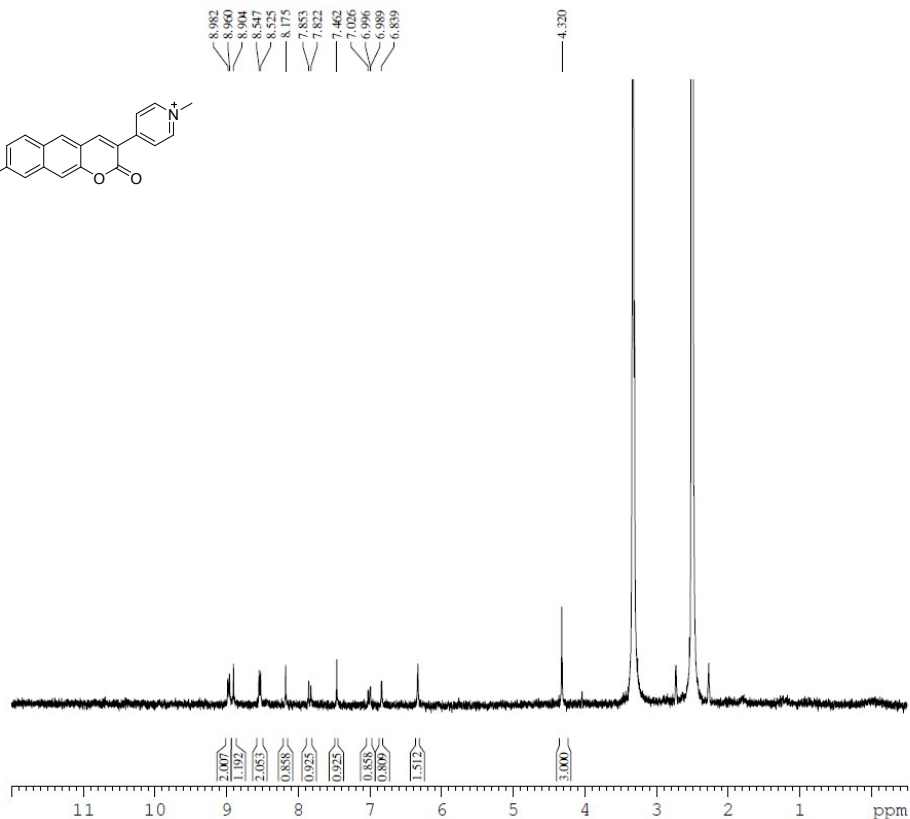

```

NAME      KHR_15_NH2DMSO
EXPNO     1
PROCNO    1
Date_     20151211
Time      10.45
INSTRUM   spect
PROBHD    5 mm PABBO BB-
PULPROG   zg30
TD        65536
SOLVENT   DMSO
NS        64
DS        2
SWH       6188.119 Hz
FIDRES    0.094423 Hz
AQ        5.2953587 sec
RG        406
DW        80.800 usec
DE        9.00 usec
TE        295.2 K
D1        2.00000000 sec
TD0       1

===== CHANNEL f1 =====
NUC1      1H
P1        11.00 usec
PL1       -2.00 dB
PL1W      8.75835800 W
SFO1      300.1318534 MHz
SI        32768
SF        300.1300011 MHz
WDW       EM
SSB       0
LB        0.30 Hz
GB        0
PC        1.00
    
```

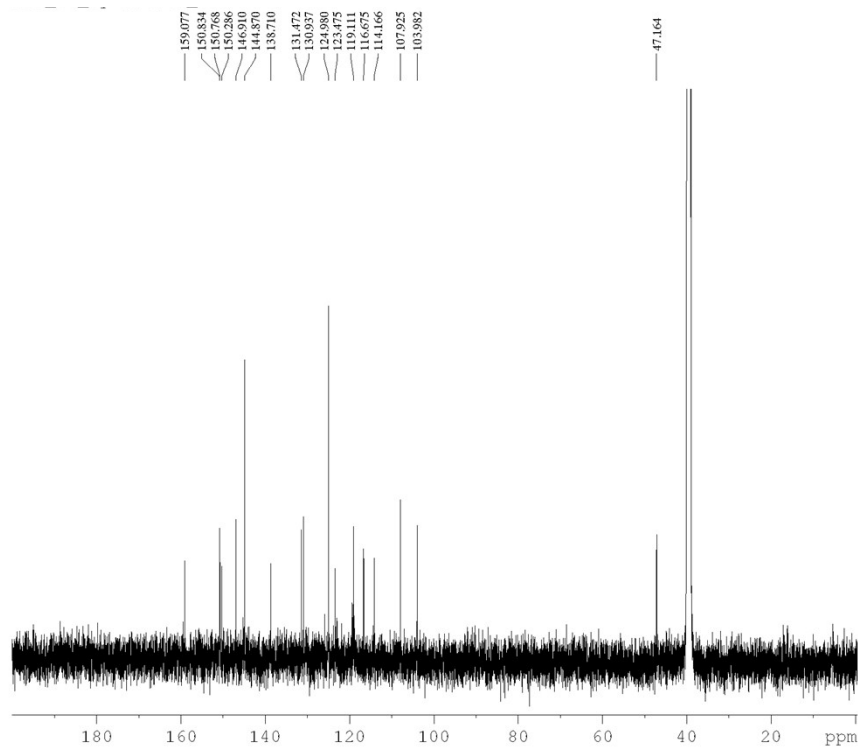

```

NAME      KHR_Py+BC660b_13C
EXPNO     1
PROCNO    1
Date_     20170501
Time      22.39
INSTRUM   spect
PROBHD    5 mm PABBO BB/
PULPROG   zgpg30
TD        65536
SOLVENT   DMSO
NS        10240
DS        4
SWH       29761.904 Hz
FIDRES    0.454131 Hz
AQ        1.1010548 sec
RG        2050
DW        16.800 usec
DE        6.50 usec
TE        298.2 K
D1        2.00000000 sec
D11       0.03000000 sec
TD0       1

===== CHANNEL f1 =====
SFO1      125.8131145 MHz
NUC1      13C
P1        10.00 usec
SI        32768
SF        125.8005960 MHz
WDW       EM
SSB       0
LB        1.00 Hz
GB        0
PC        1.40
    
```

Py<sup>+</sup>O-BC600

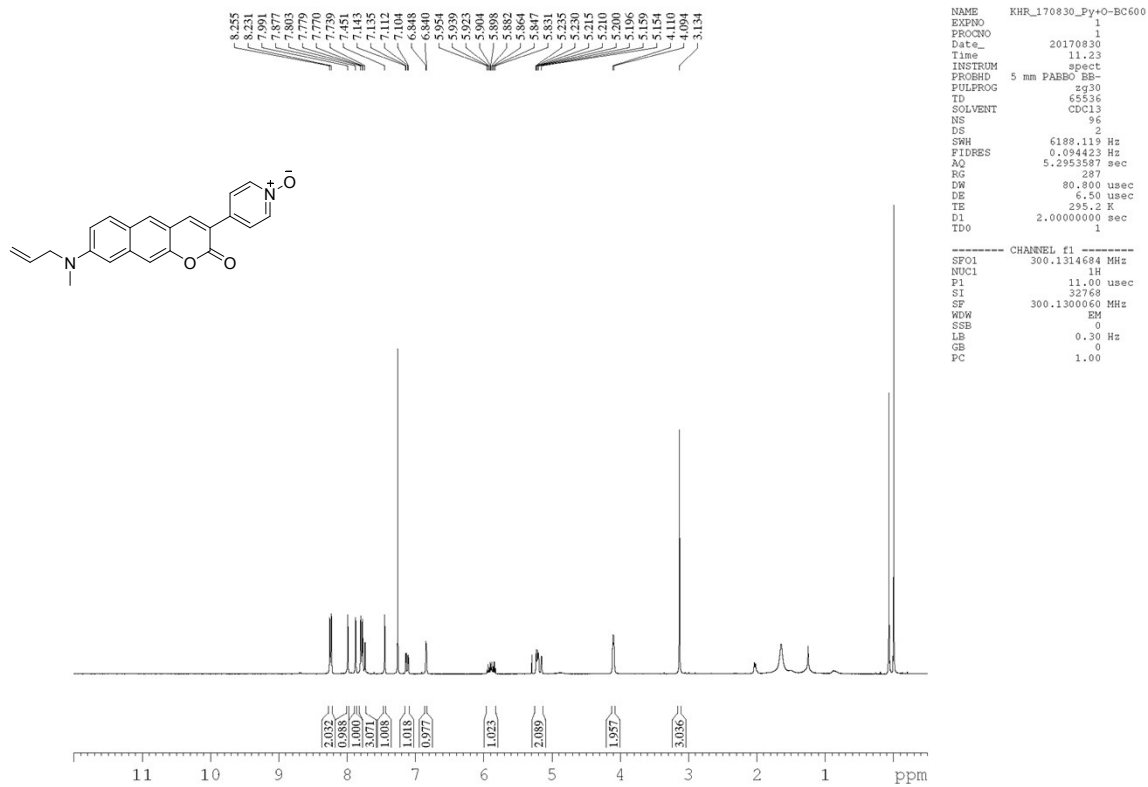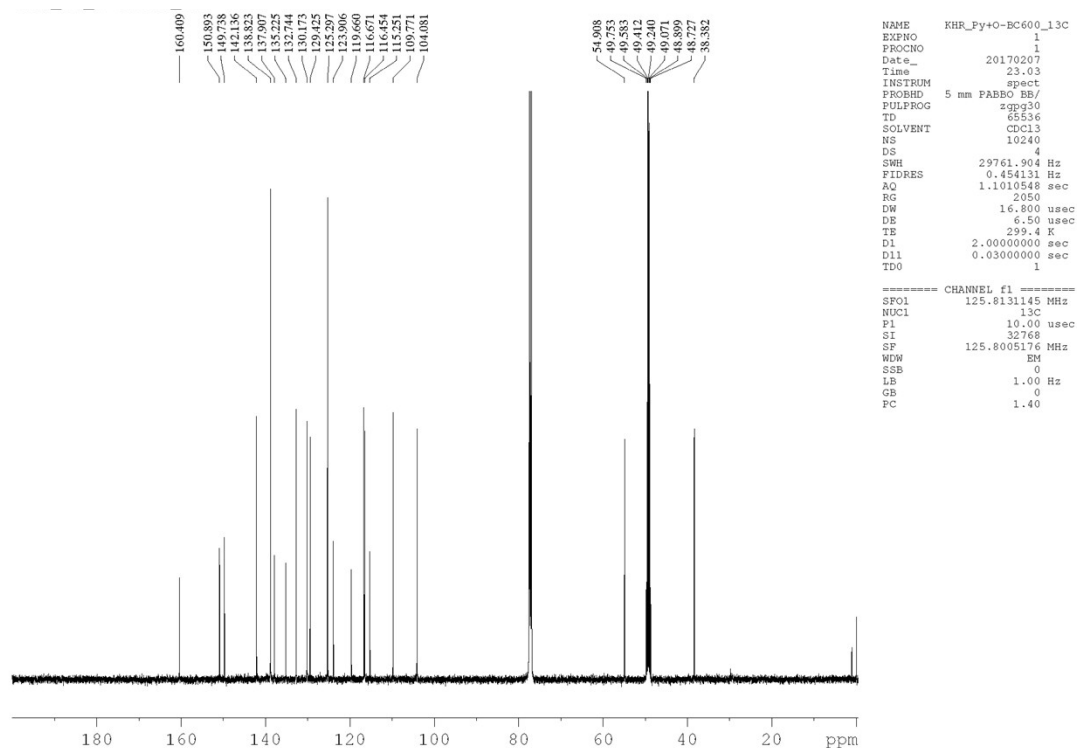

## 7. HRMS Spectra

### Py<sup>+</sup>BC690

[ Mass Spectrum ]  
Data : J-HRFAB Date : 16-Feb-2017 10:10  
Instrument : MStation  
Sample : -  
Note : -  
Inlet : Direct Ion Mode : FAB+  
Spectrum Type : Normal Ion [EF-Linear]  
RT : 0.40 min Scan#: 9 Temp : 3276.7 deg.C  
BP : m/z 357.1604 Int. : 373.16 (3912822)  
Output m/z range : 310 to 420 Cut Level : 0.00 %

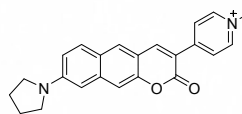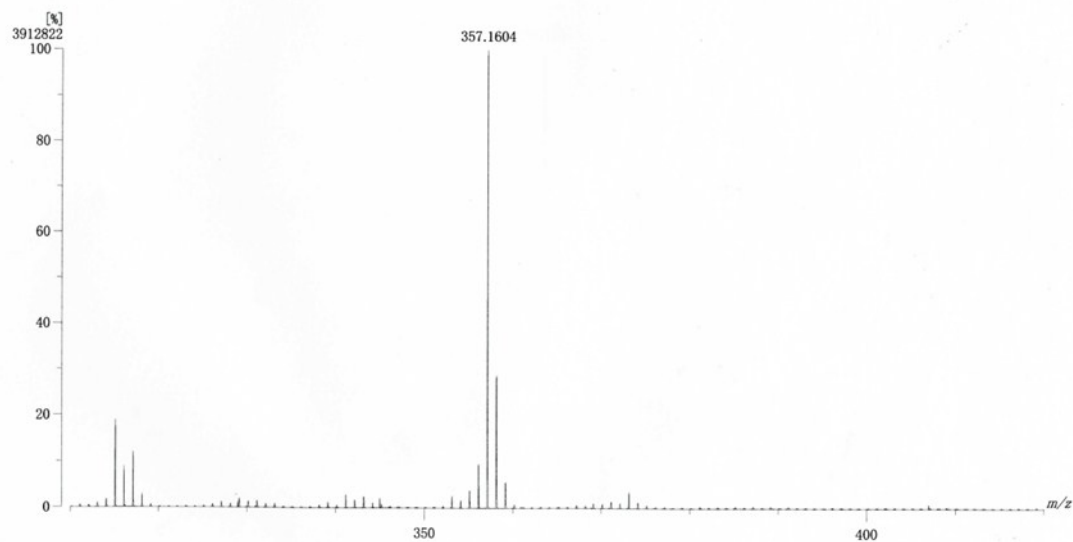

### Py<sup>+</sup>BC680a

[ Mass Spectrum ]  
Data : H-HRFAB Date : 16-Feb-2017 09:51  
Instrument : MStation  
Sample : -  
Note : -  
Inlet : Direct Ion Mode : FAB+  
Spectrum Type : Normal Ion [EF-Linear]  
RT : 0.15 min Scan#: 4 Temp : 3276.7 deg.C  
BP : m/z 331.1444 Int. : 23.99 (251551)  
Output m/z range : 273 to 381 Cut Level : 0.00 %

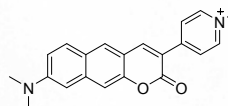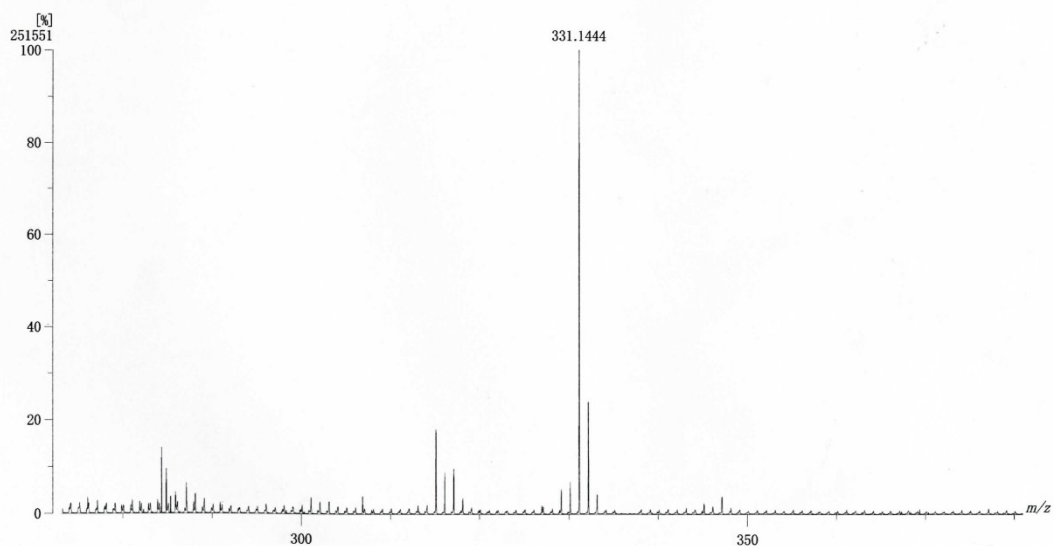



### Py<sup>+</sup>BC680b

[ Mass Spectrum ]  
Data : I-HRFAB Date : 16-Feb-2017 10:02  
Instrument : MStation  
Sample : -  
Note : -  
Inlet : Direct Ion Mode : FAB+  
Spectrum Type : Normal Ion [EF-Linear]  
RT : 0.15 min Scan# : 4 Temp : 3276.7 deg.C  
BP : m/z 357.1601 Int. : 143.53 (1504989)  
Output m/z range : 310 to 420 Cut Level : 0.00 %

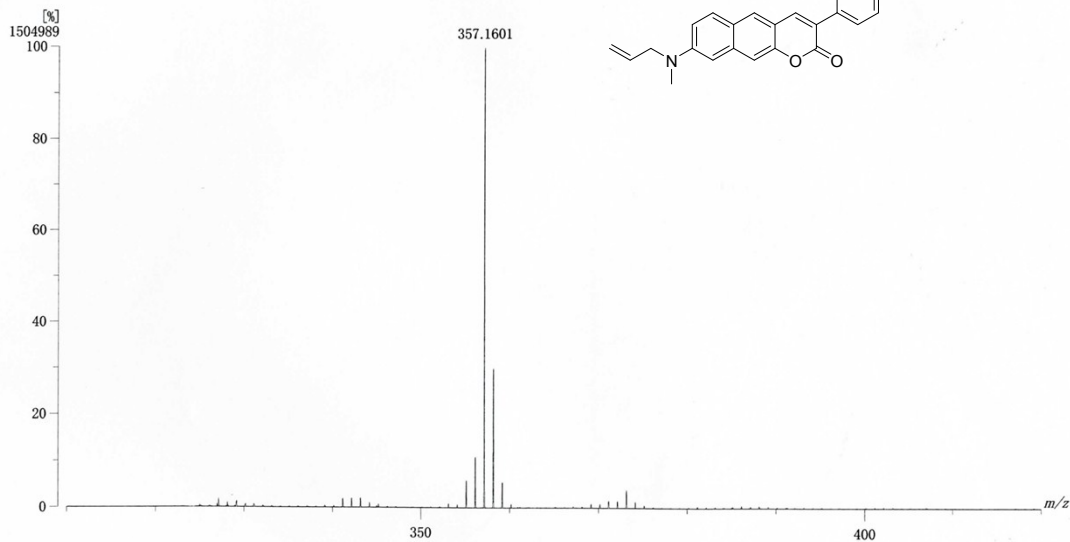

### Py<sup>+</sup>BC660a

[ Mass Spectrum ]  
Data : G-HRFAB Date : 15-Feb-2017 17:19  
Instrument : MStation  
Sample : -  
Note : -  
Inlet : Direct Ion Mode : FAB+  
Spectrum Type : Normal Ion [EF-Linear]  
RT : 0.20 min Scan# : 5 Temp : 3276.7 deg.C  
BP : m/z 317.1288 Int. : 120.63 (1264888)  
Output m/z range : 270 to 380 Cut Level : 0.00 %

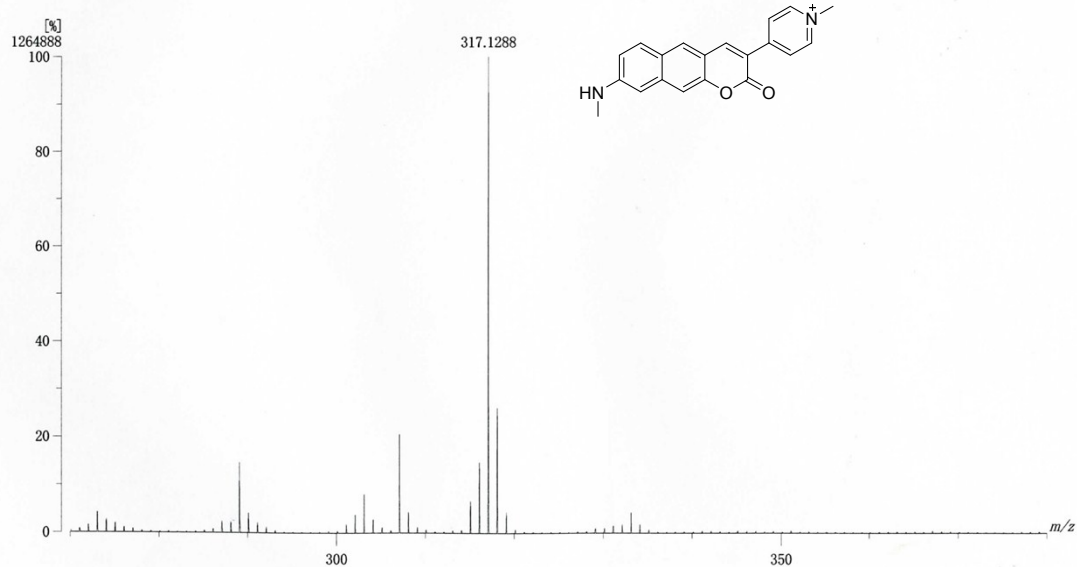

### Py<sup>+</sup>BC660b

[ Mass Spectrum ]  
Data : B-HRFAB Date : 15-Feb-2017 16:12  
Instrument : MStation  
Sample : -  
Note : -  
Inlet : Direct Ion Mode : FAB+  
Spectrum Type : Normal Ion [EF-Linear]  
RT : 0.15 min Scan# : 4 Temp : 3276.7 deg.C  
BP : m/z 303.1131 Int. : 0.70 (7388)  
Output m/z range : 263 to 380 Cut Level : 0.00 %

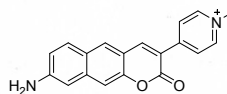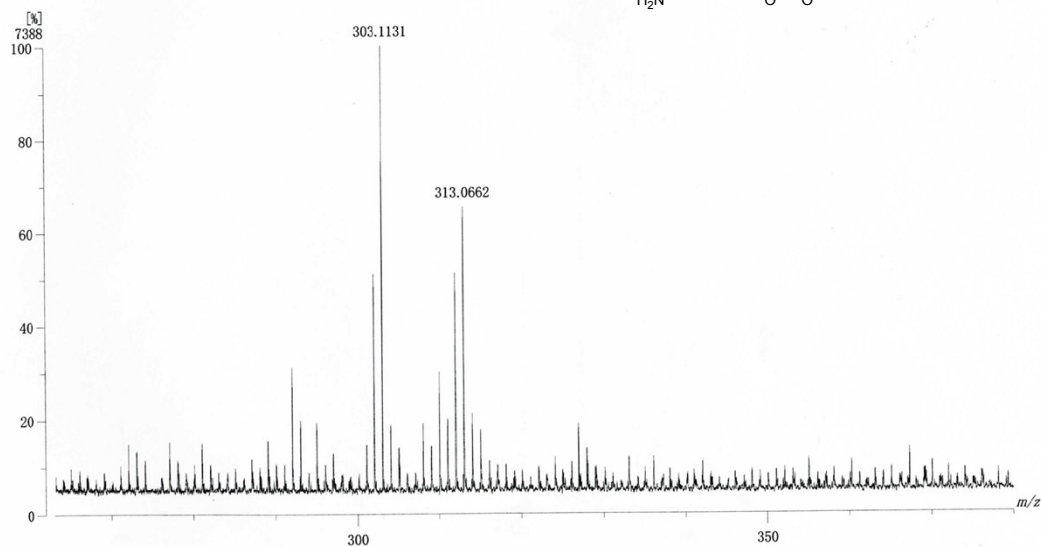

### Py<sup>+</sup>O-BC600

[ Mass Spectrum ]  
Data : K-HRFAB Date : 16-Feb-2017 10:18  
Instrument : MStation  
Sample : -  
Note : -  
Inlet : Direct Ion Mode : FAB+  
Spectrum Type : Normal Ion [EF-Linear]  
RT : 0.60 min Scan# : 13 Temp : 3276.7 deg.C  
BP : m/z 313.1955 Int. : 3.60 (3774)  
Output m/z range : 317 to 413 Cut Level : 0.00 %

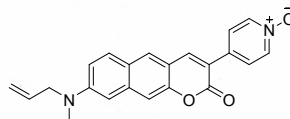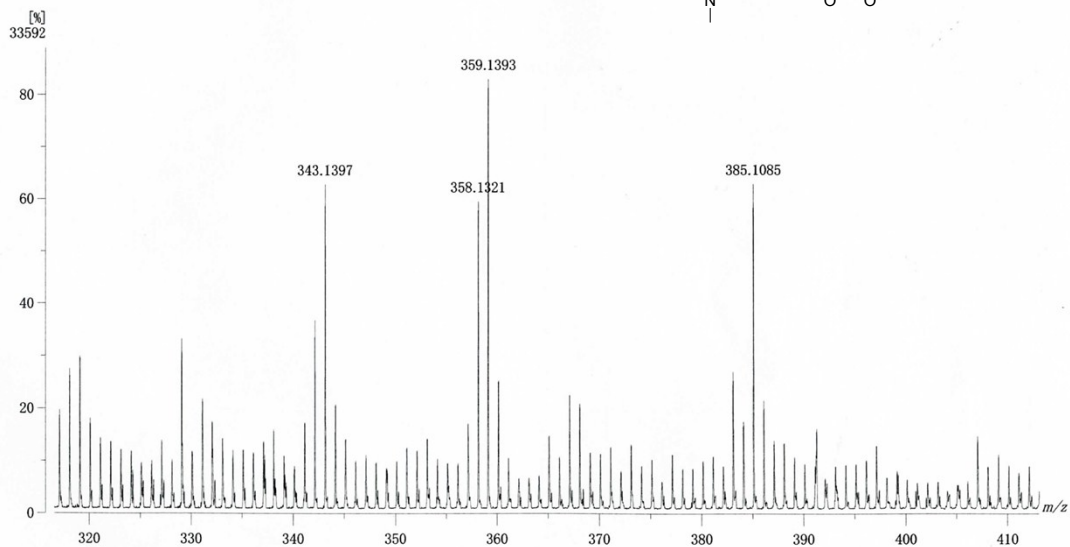

Supplement: SC-008-C7SC03362A-s001.pdf [file SC-008-C7SC03362A-s001.pdf]
